# Supplementary material for: New multicomponent reactions in water: a facile synthesis of 1,3-dioxo-2-indanilidene-heterocyclic scaffolds and indenoquinoxalines through reaction of ninhydrin-malononitrile adduct with diverse N-binucleophiles
Source: Royal Society of Chemistry journal article supplement (doi:10.1039/d2ra06469c), 2022-01-01
Supplement: d2ra06469c1.pdf [file d2ra06469c1.pdf]

## Supporting Information

### New multicomponent reactions in water: A facile synthesis of 1,3-dioxo-2-indanilidene-heterocyclic scaffolds and indenoquinoxalines through reaction of ninhydrin-malononitrile adduct with diverse *N*-binucleophiles

Zahra Rahimi, Mohammad Bayat,\* Hajar Hosseini

*Department of Chemistry, Faculty of Science, Imam Khomeini International University, Qazvin, Iran.*

*E-mail: bayat\_mo@yahoo.com, m.bayat@sci.ikiu.ac.ir*

#### Table of Contents

| Title                                                                                                       | Page  |
|-------------------------------------------------------------------------------------------------------------|-------|
| Title, author's name, address and table of contents                                                         | 1     |
| Experimental Section; General remarks                                                                       | 2     |
| <b>Figure 1.</b> Structure of all products <b>4,6,8,10,12,14</b>                                            | 3     |
| <sup>1</sup> H and <sup>13</sup> C NMR and IR and Mass spectrums of <b>4a</b>                               | 4-7   |
| <sup>1</sup> H and D <sub>2</sub> O exchange and <sup>13</sup> C NMR and IR and Mass spectrums of <b>4b</b> | 8-12  |
| <sup>1</sup> H and <sup>13</sup> C NMR and IR and Mass spectrums of <b>4c</b>                               | 13-16 |
| <sup>1</sup> H and <sup>13</sup> C NMR and Mass spectrums of <b>4d</b>                                      | 17-19 |
| <sup>1</sup> H and <sup>13</sup> C NMR and Mass spectrums of <b>4e</b>                                      | 20-22 |
| <sup>1</sup> H and <sup>13</sup> C NMR and IR and Mass spectrums of <b>6a</b>                               | 23-26 |
| <sup>1</sup> H and <sup>13</sup> C NMR and IR and Mass spectrums of <b>6b</b>                               | 27-30 |
| <sup>1</sup> H and <sup>13</sup> C NMR and IR and Mass spectrums of <b>6c</b>                               | 31-34 |
| <sup>1</sup> H and D <sub>2</sub> O exchange and <sup>13</sup> C NMR and IR and Mass spectrums of <b>8</b>  | 35-39 |
| <sup>1</sup> H and D <sub>2</sub> O exchange and <sup>13</sup> C NMR and IR and Mass spectrums of <b>10</b> | 40-44 |
| <b>Figure 2.</b> The X-ray structure of compound <b>12</b>                                                  | 45    |
| <sup>1</sup> H and <sup>13</sup> C NMR and IR and Mass spectrums of <b>12</b>                               | 46-49 |
| <sup>1</sup> H and <sup>13</sup> C NMR and IR and Mass spectrums of <b>14</b>                               | 50-53 |

## Experimental Section

### General remarks:

All commercially available reagents and other solvents were purchased from Aldrich and Merck chemical Co. and used without further purification. The NMR spectra were recorded with a Bruker DRX-300 AVANCE instrument (300 MHz for  $^1\text{H}$  and 75.4 MHz for  $^{13}\text{C}$ ) with  $\text{DMSO-}d_6$  as solvent. Chemical shifts are given in ppm ( $\delta$ ) and coupling constants ( $J$ ) are reported in Hertz (Hz).

Melting points were measured with an electrothermal 9100 apparatus. Mass spectra were recorded with an Agilent 5975C VL MSD with Triple-Axis detector operating at an ionization potential of 70 eV. IR spectra were measured with Bruker Tensor 27 spectrometer.

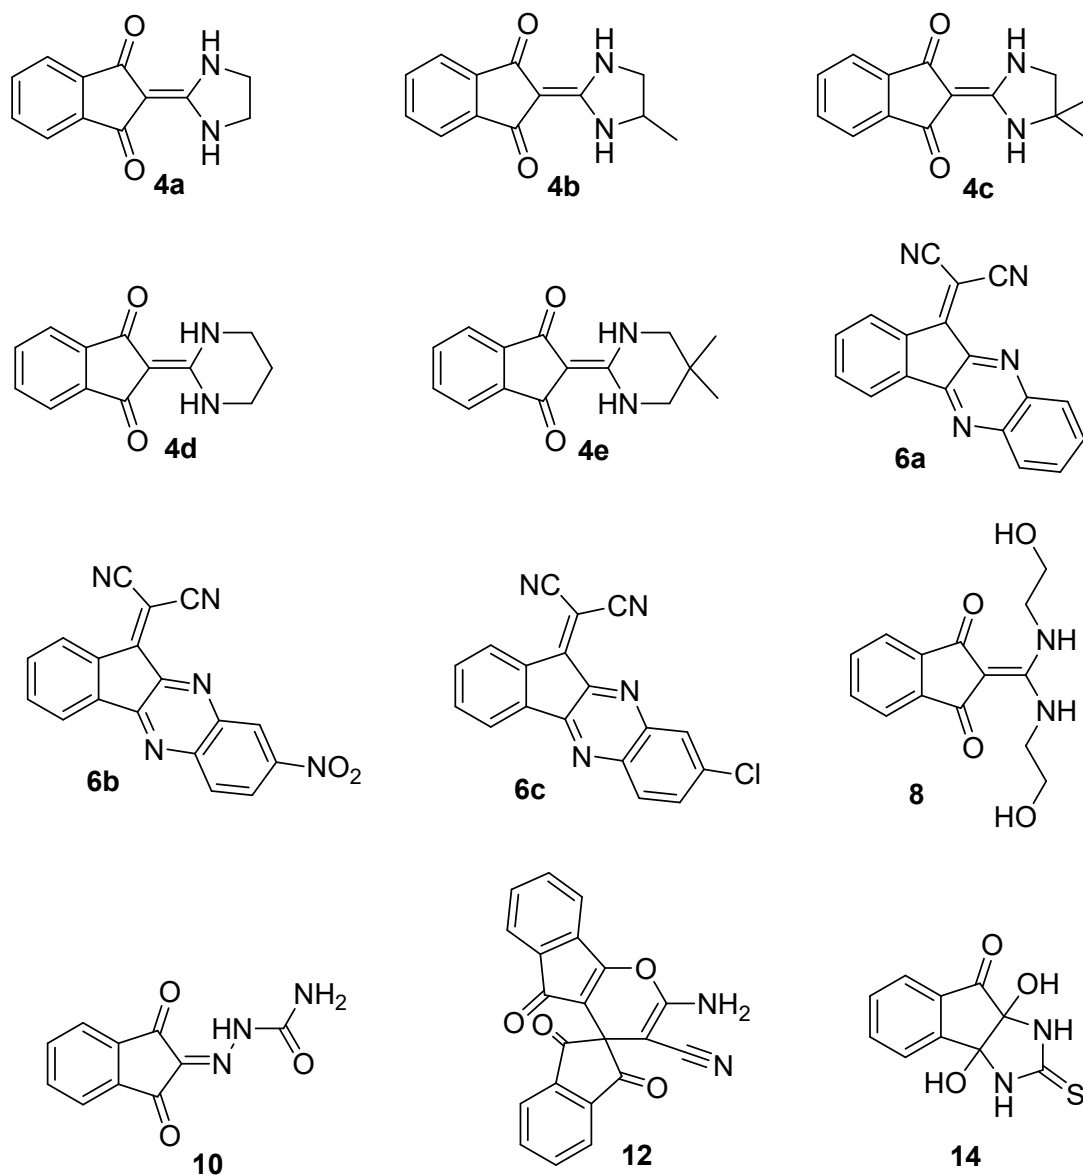

**Figure 1.** Structure of all products **4,6,8,10,12,14**.

The structure of the products were deduced from their IR, Mass,  $^1\text{H}$  NMR, and  $^{13}\text{C}$  NMR spectra (see the following images).

The  $^1\text{H}$  and  $^{13}\text{C}$  NMR spectra are taken in  $\text{DMSO}-d_6$ , but two derivatives **6a,6c** have low solubility, so they have no clear carbon spectra.

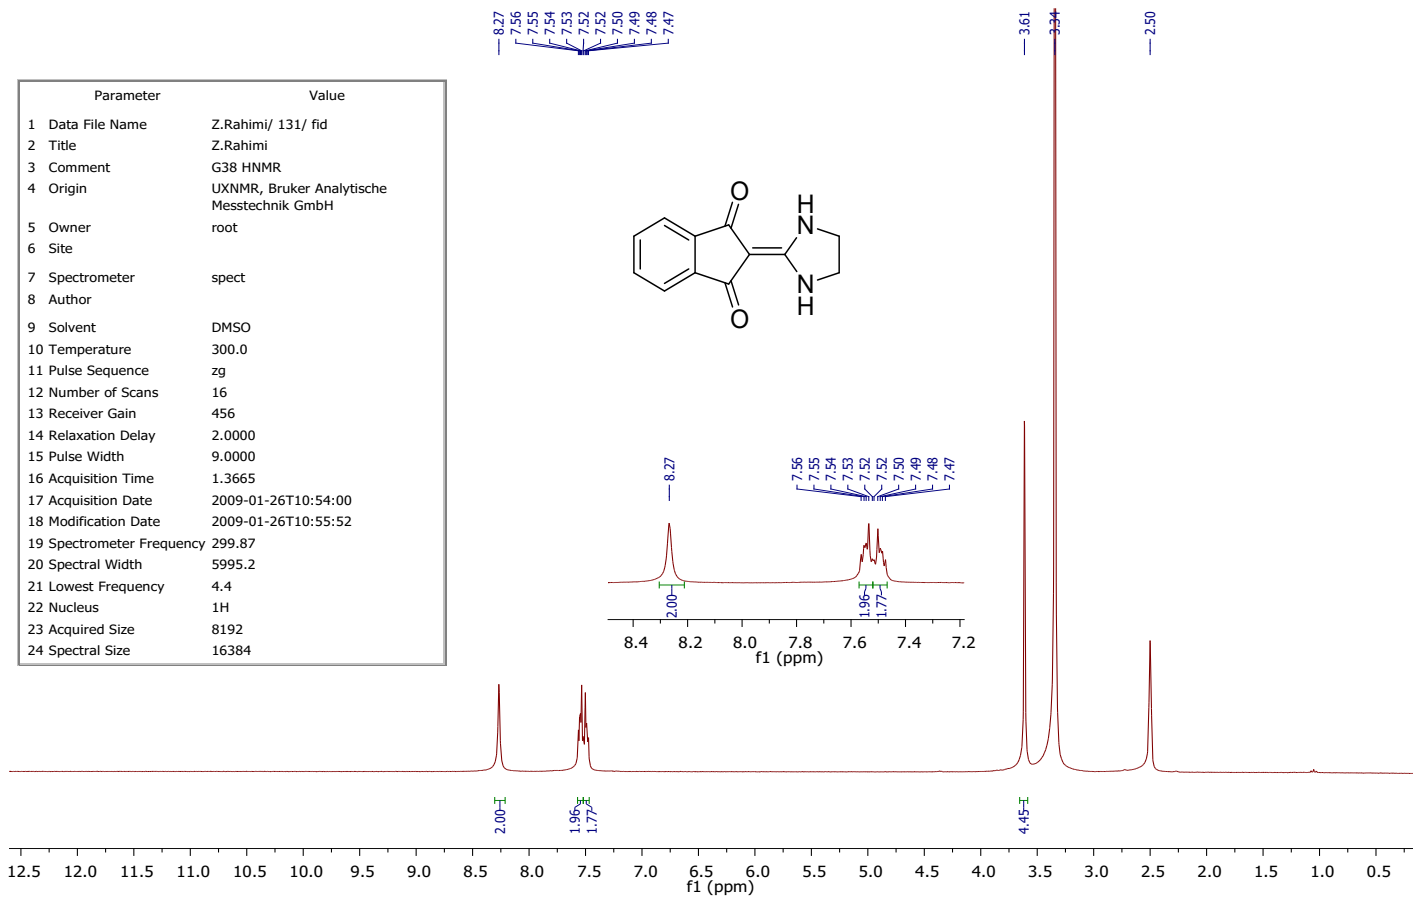**<sup>1</sup>H NMR of 4a**

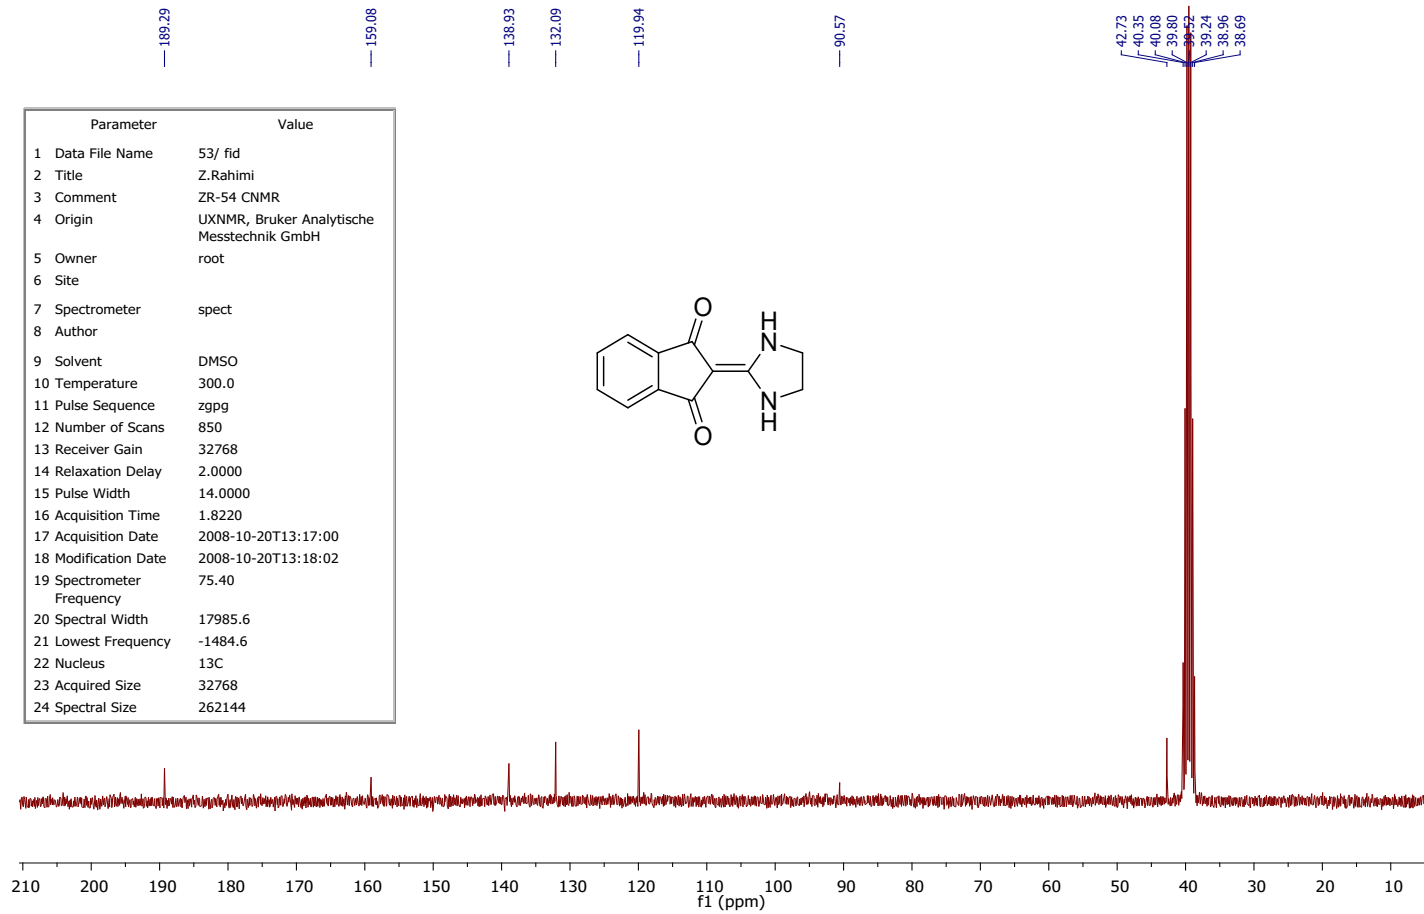

**<sup>13</sup>C NMR of 4a**

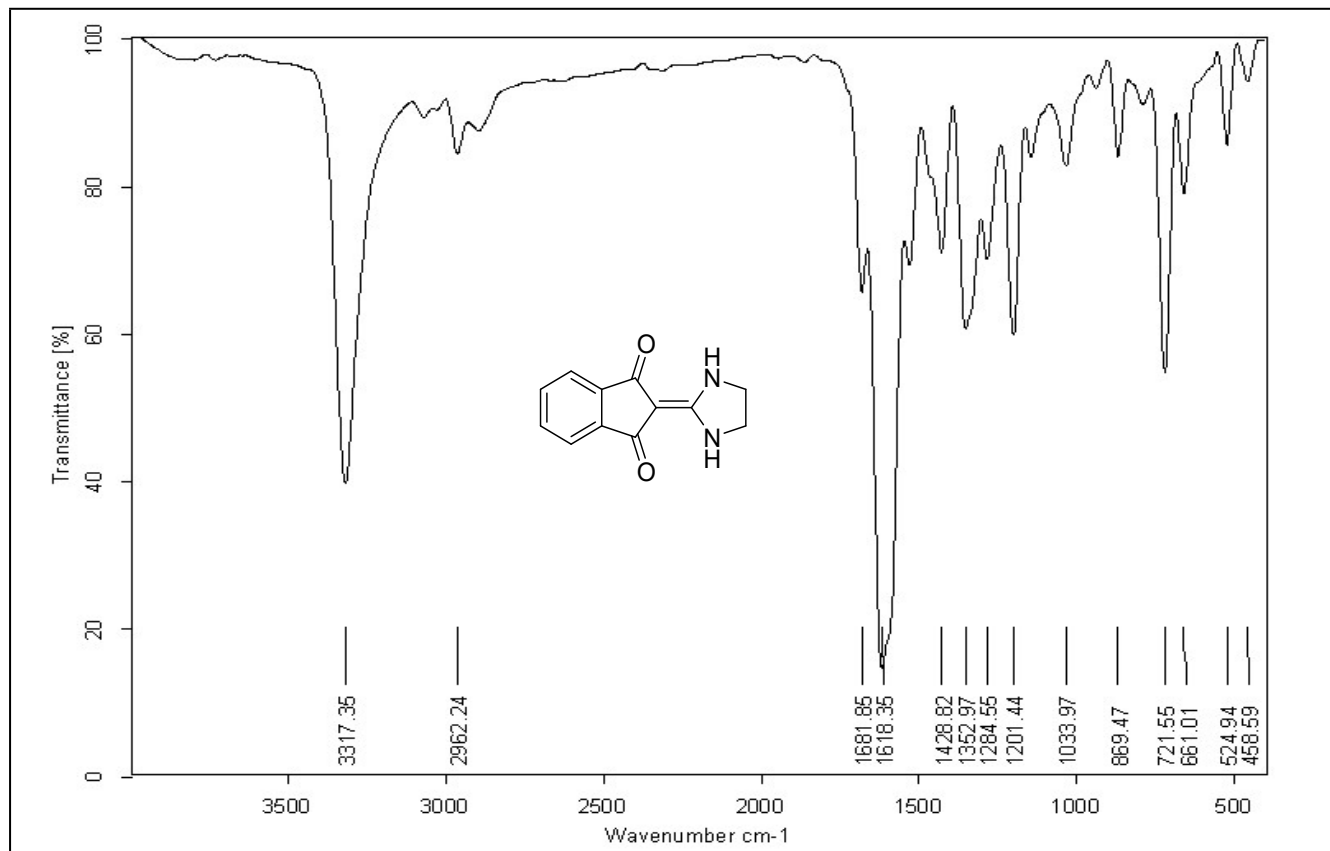

**IR of 4a**

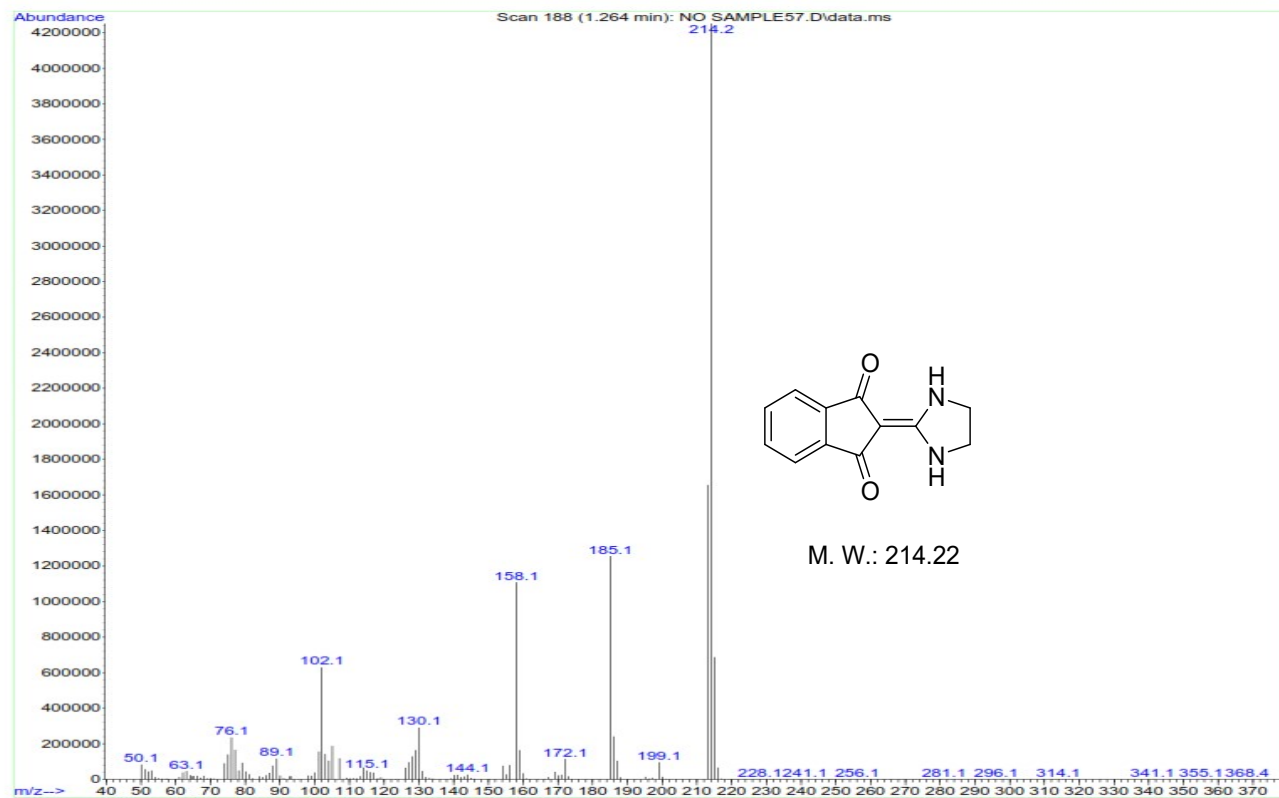

MS of 4a

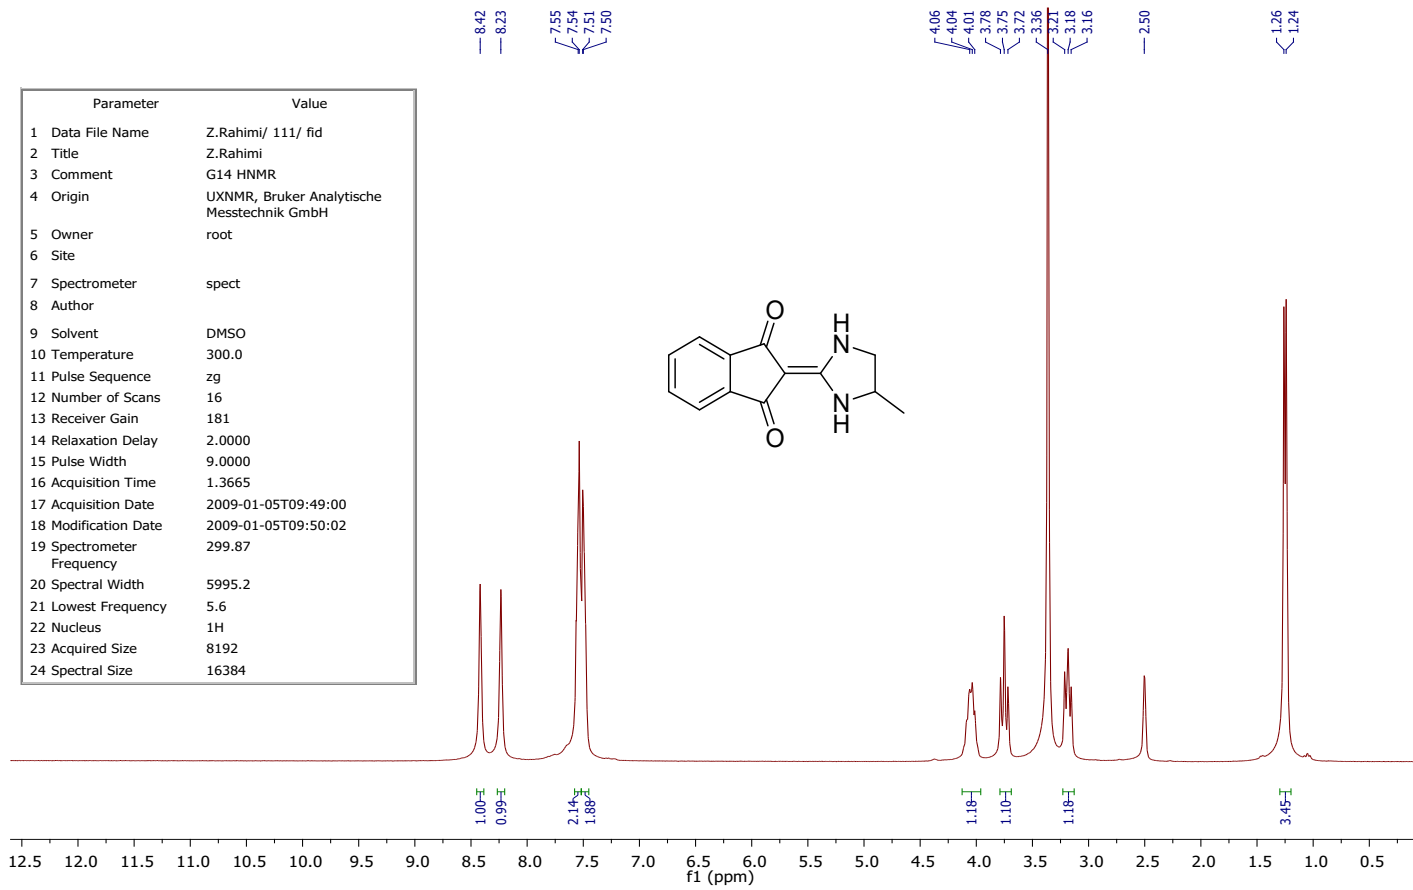**<sup>1</sup>H NMR of 4b**



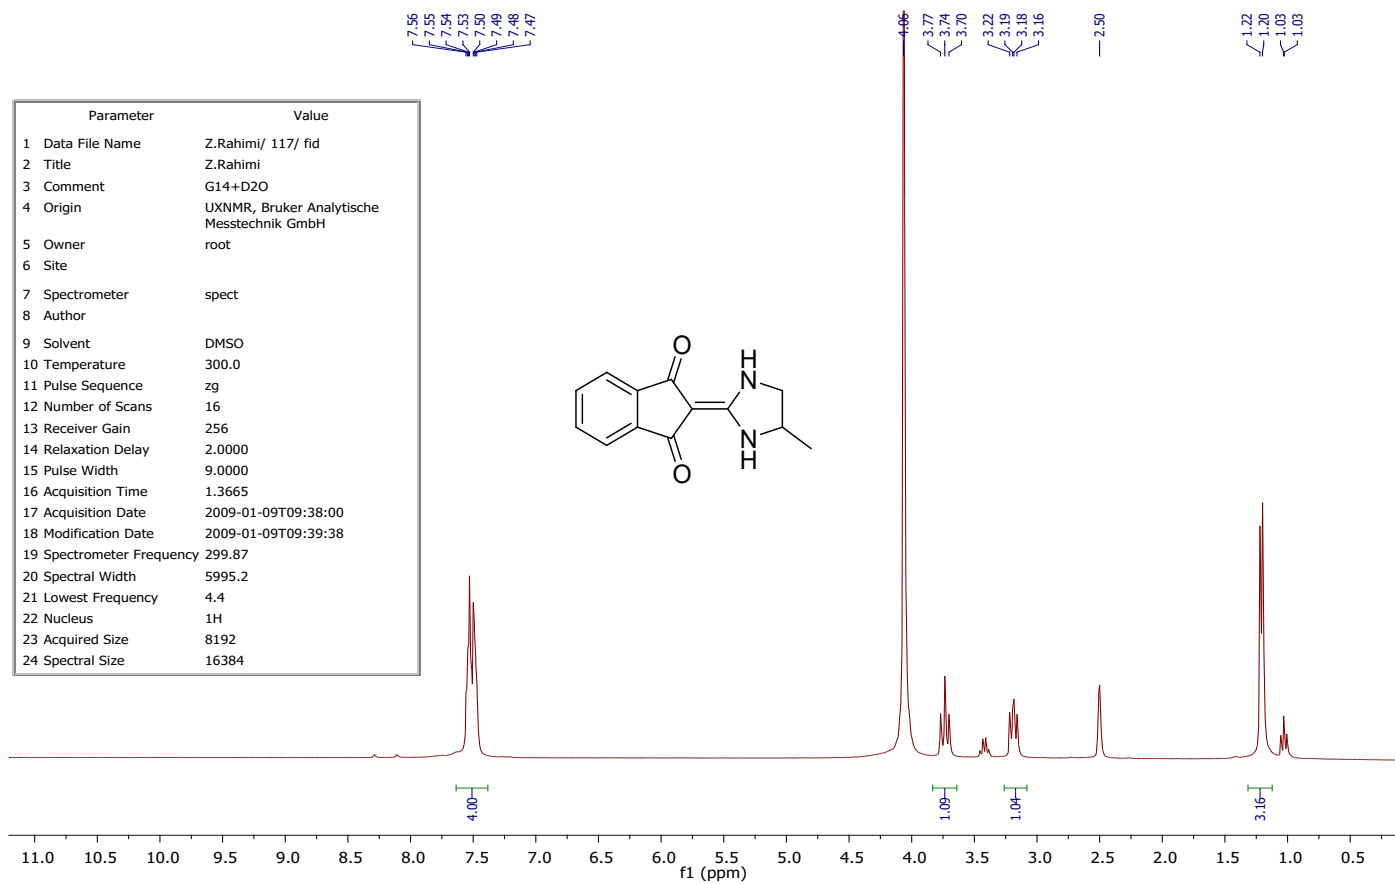

**<sup>1</sup>H-NMR with D<sub>2</sub>O exchange of 4b**

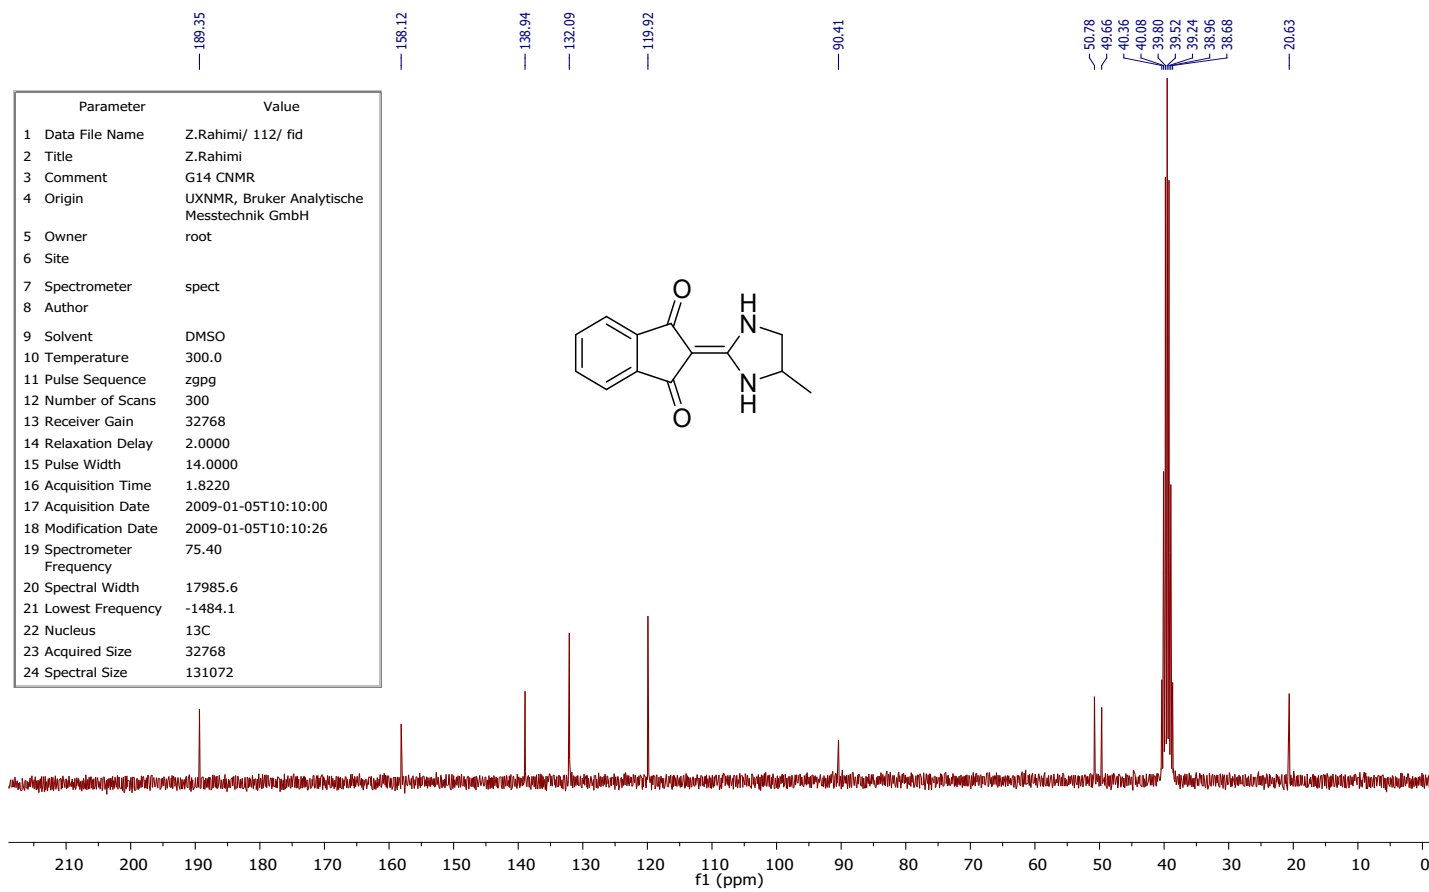

**<sup>13</sup>C NMR of 4b**

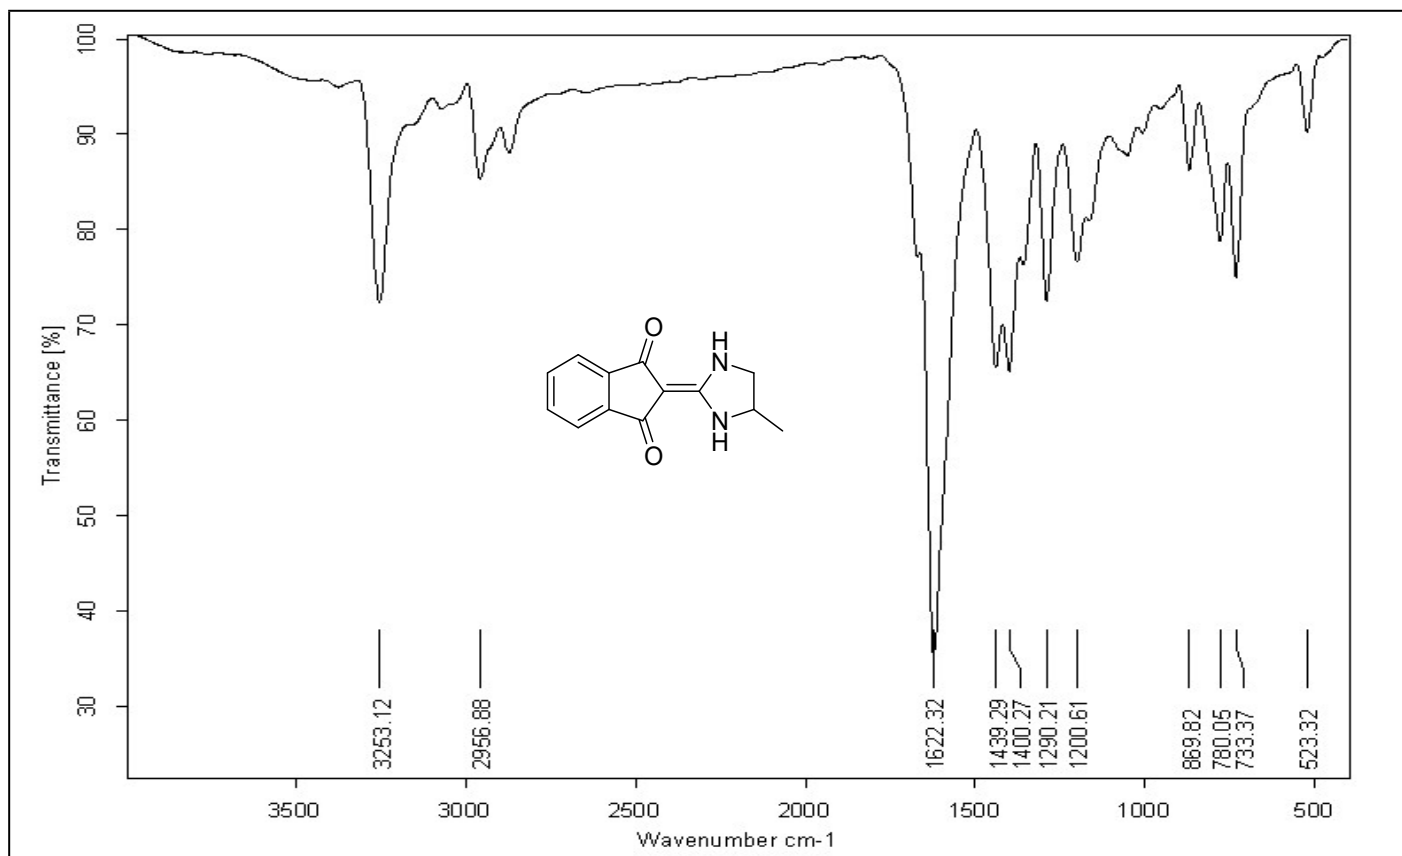**IR of 4b**

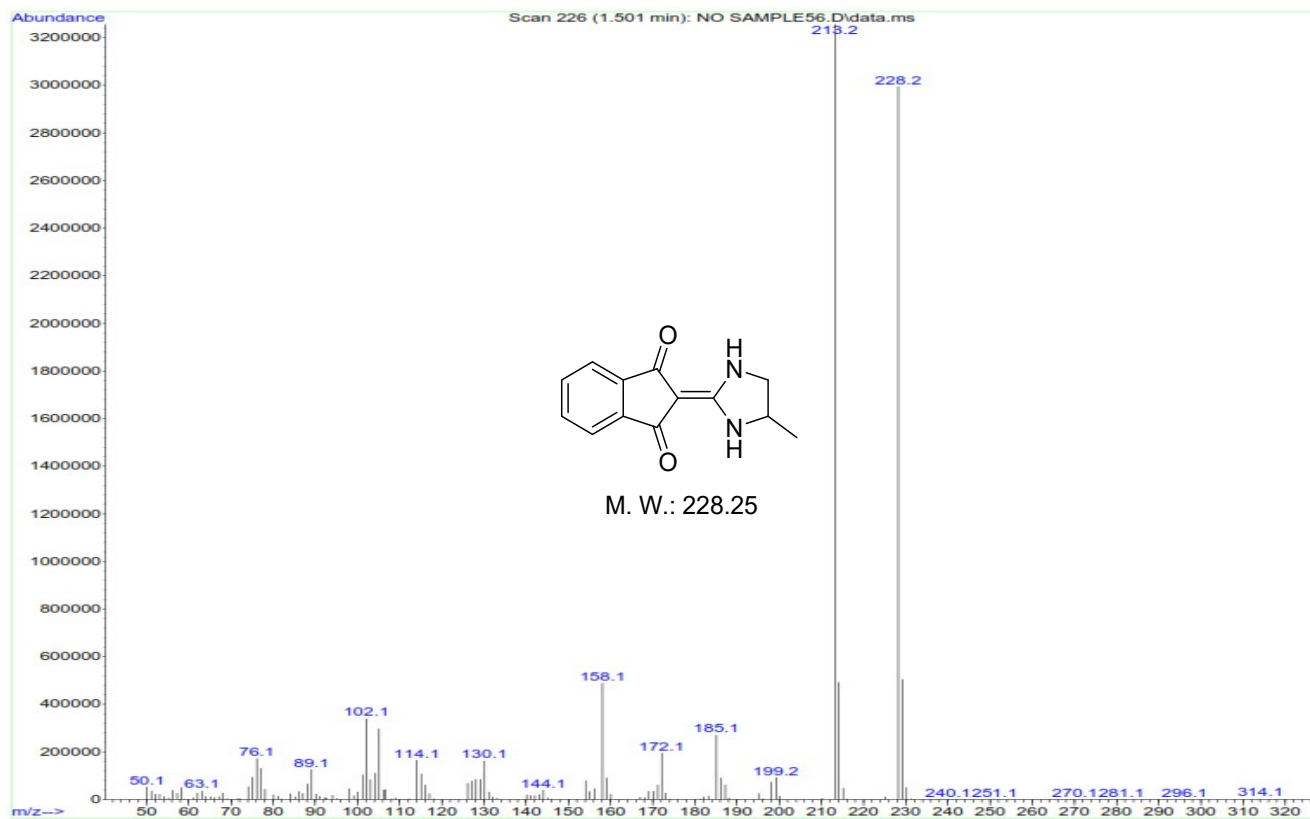

MS of 4b

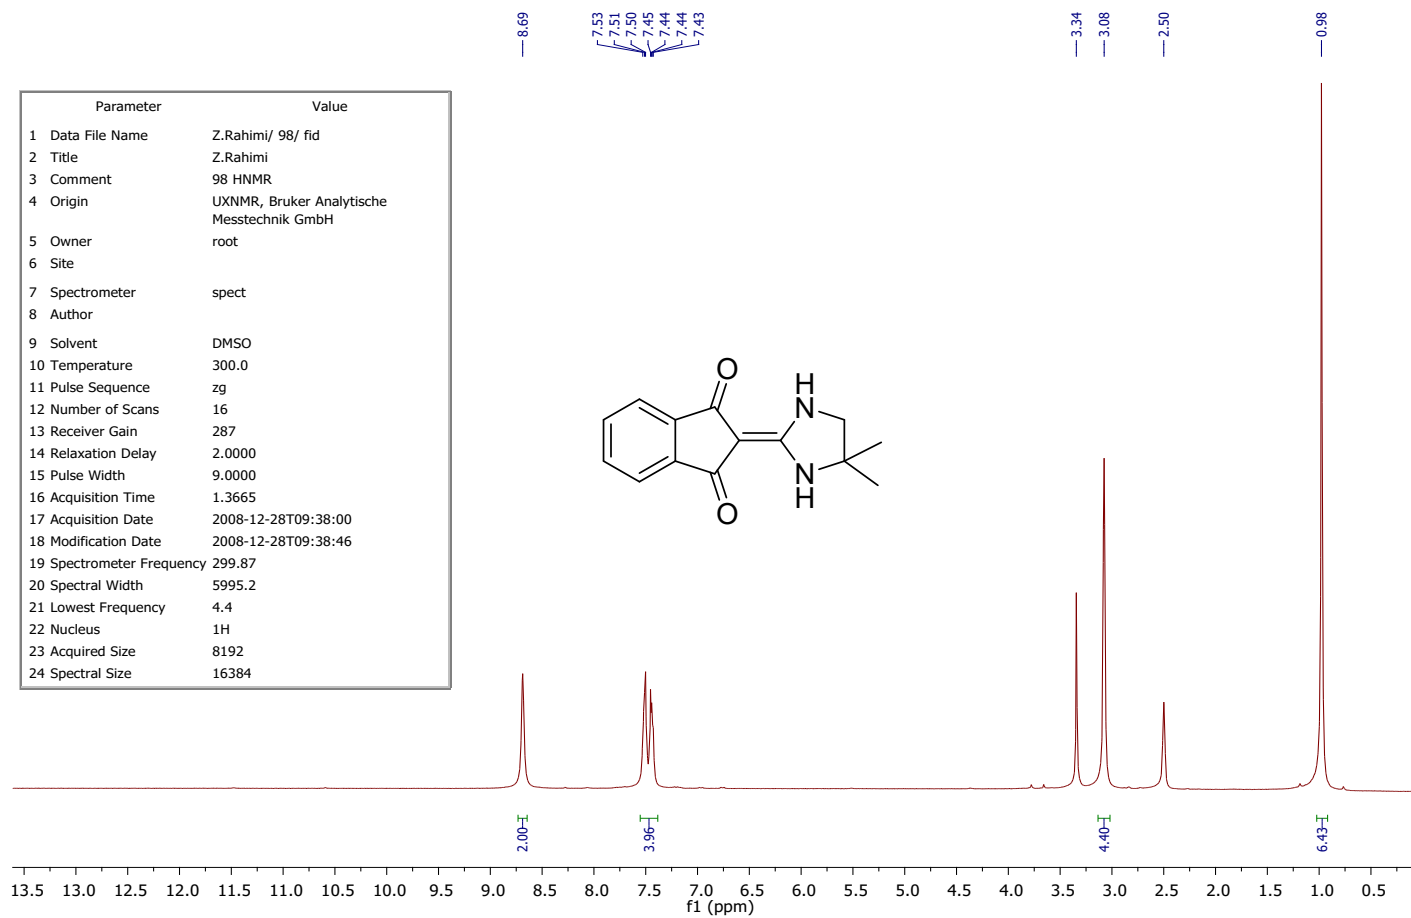**<sup>1</sup>H NMR of 4c**

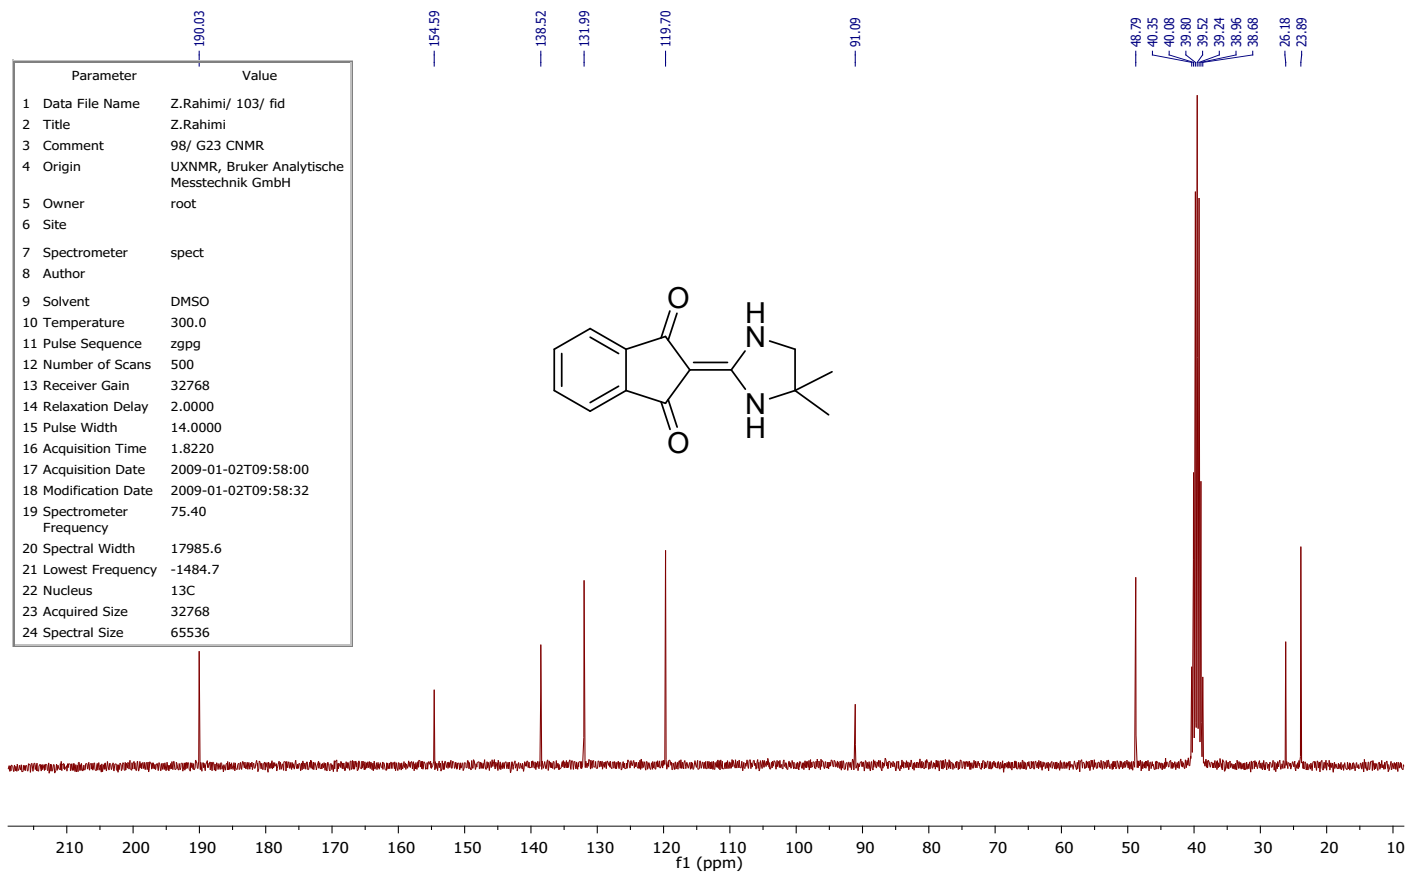**<sup>13</sup>C NMR of 4c**

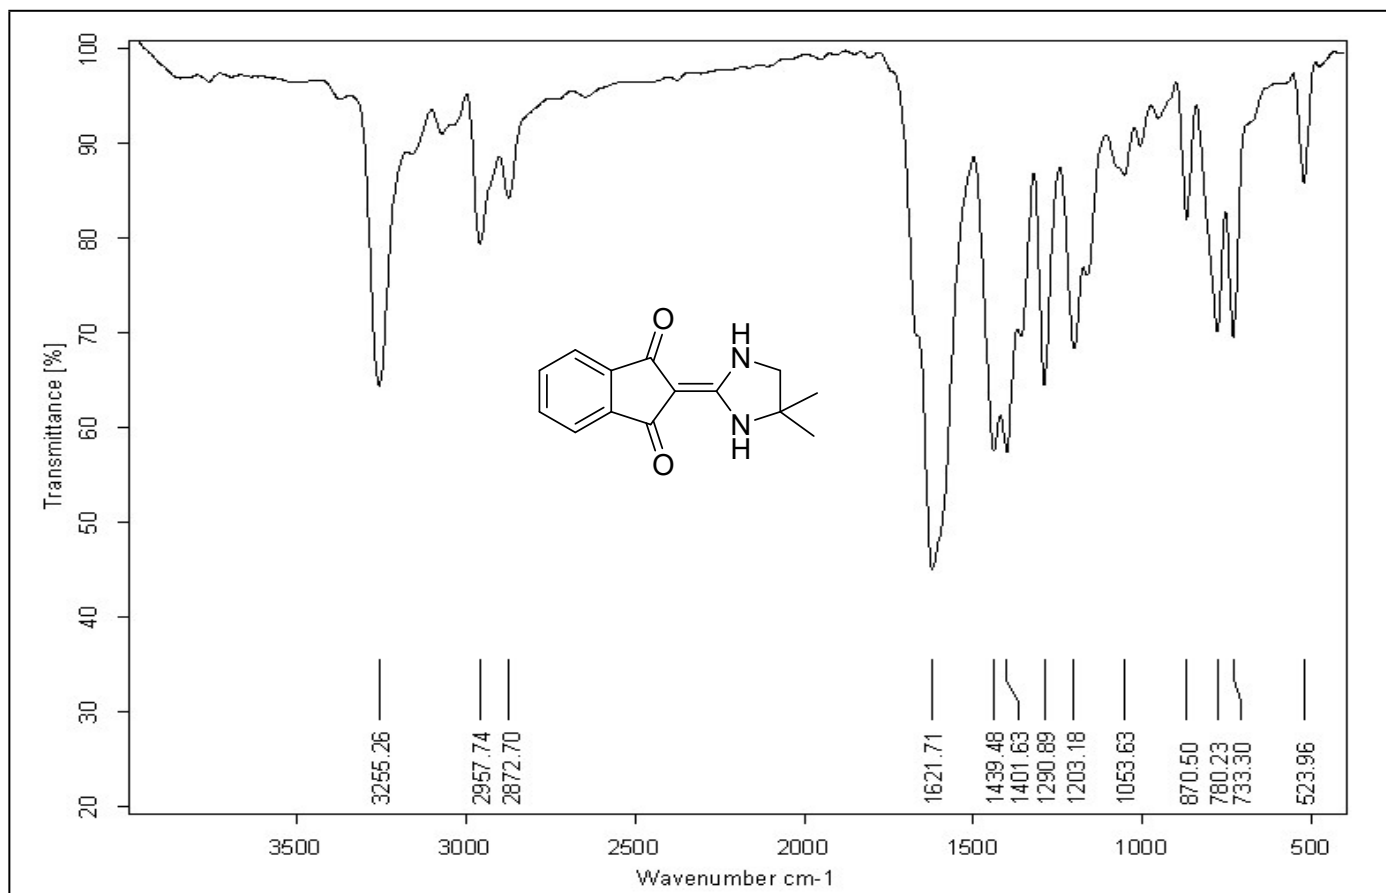

IR of 4c

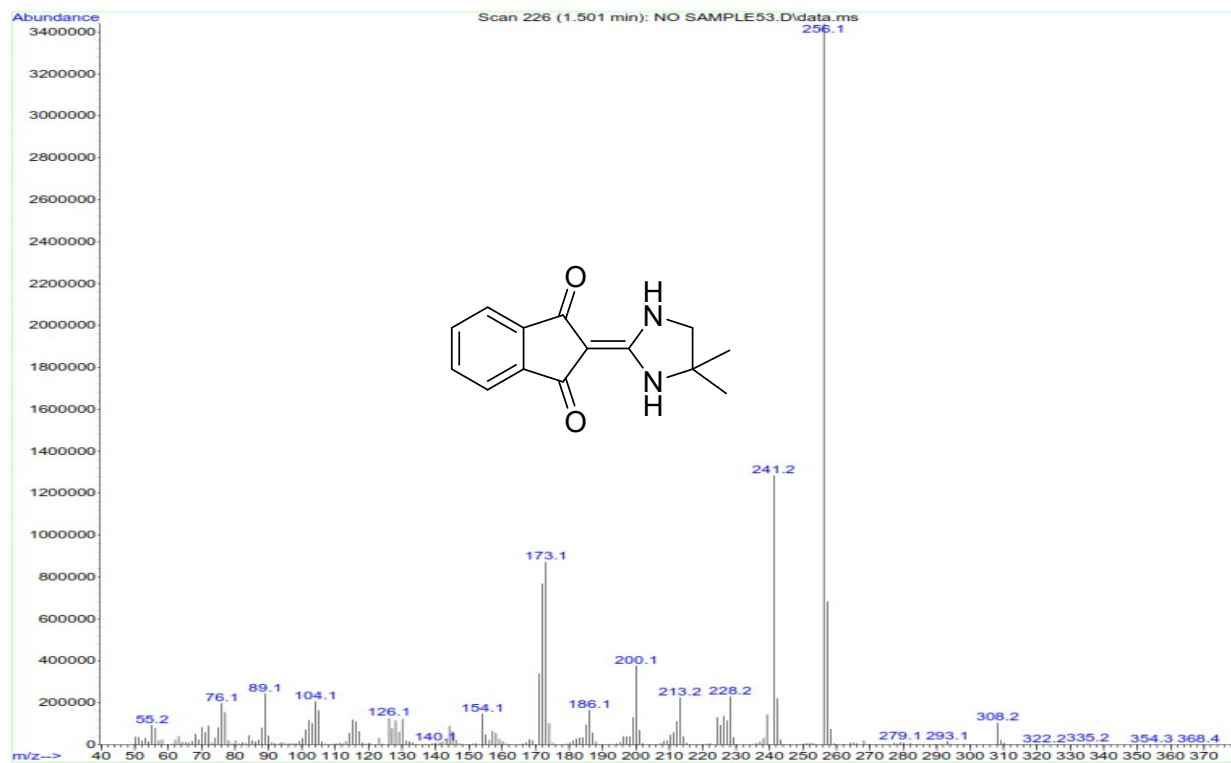

MS of 4c



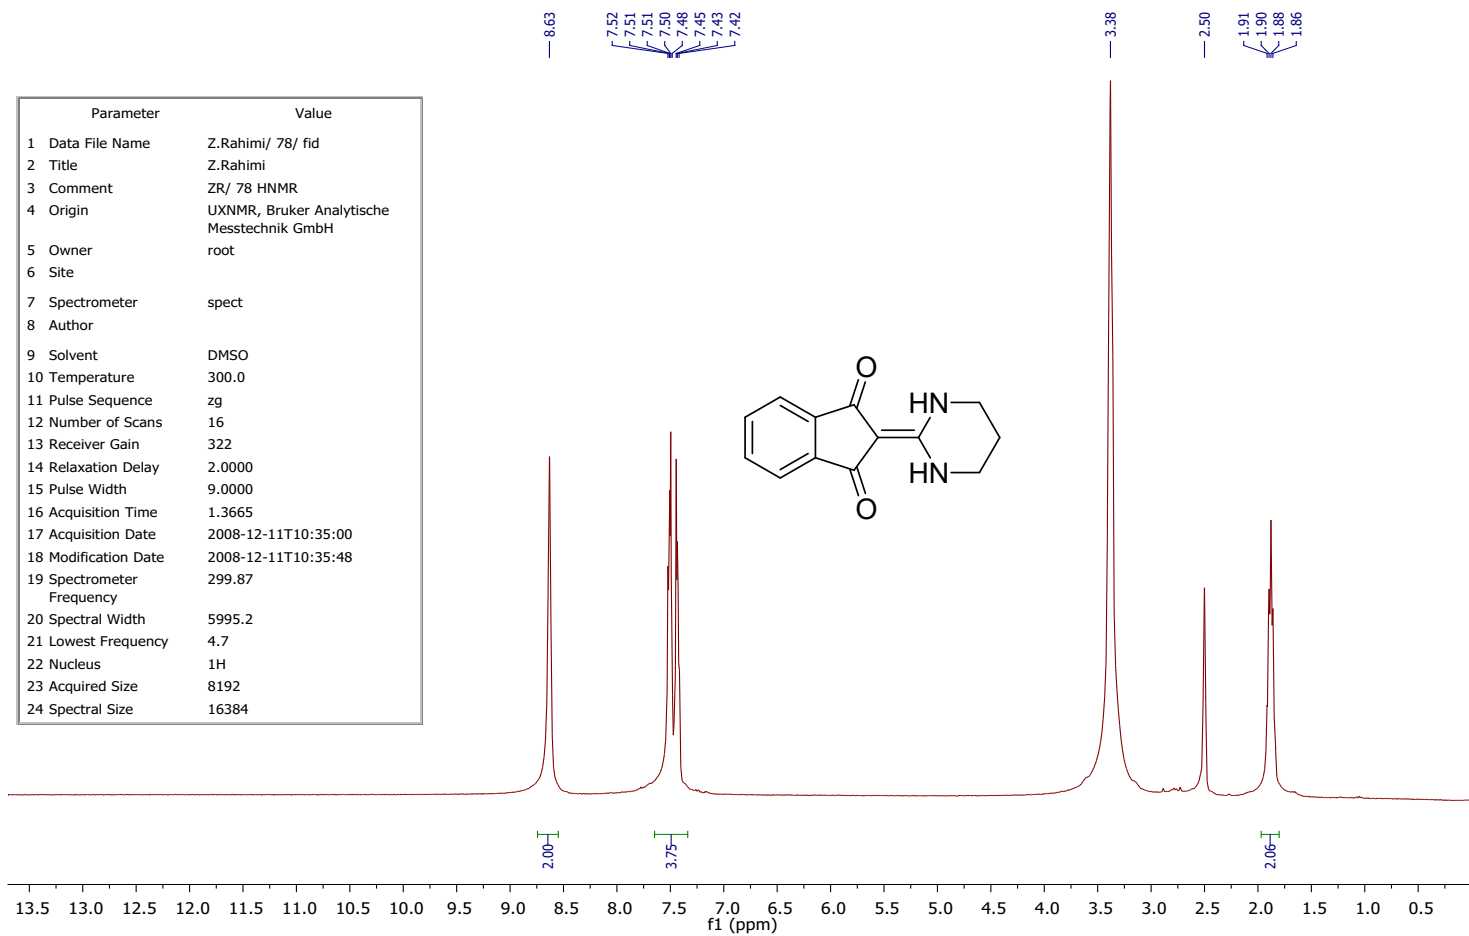 $^1\text{H}$  NMR of 4d

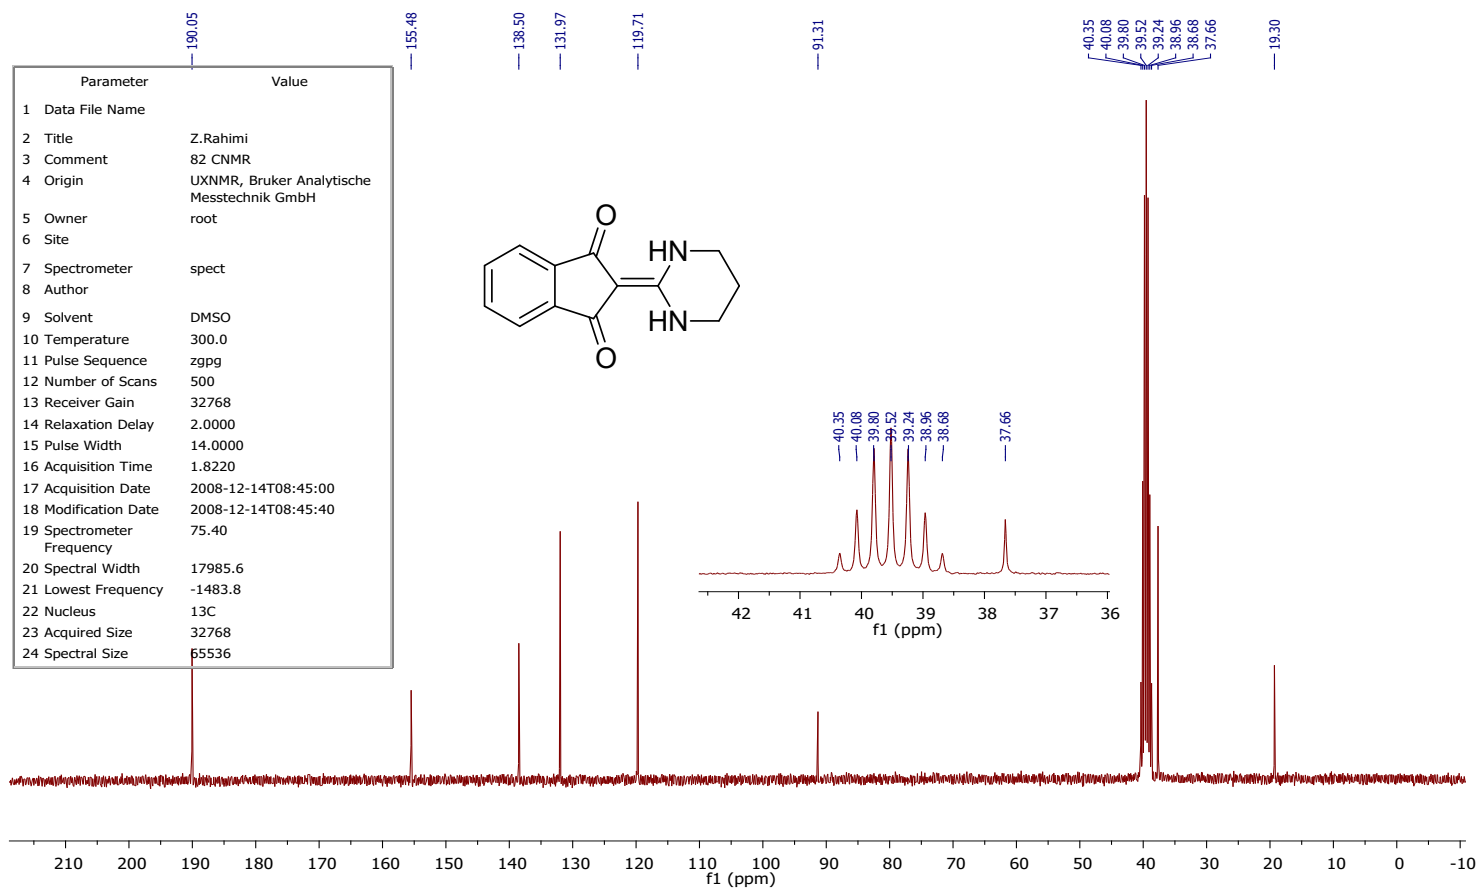**<sup>13</sup>C NMR of 4d**

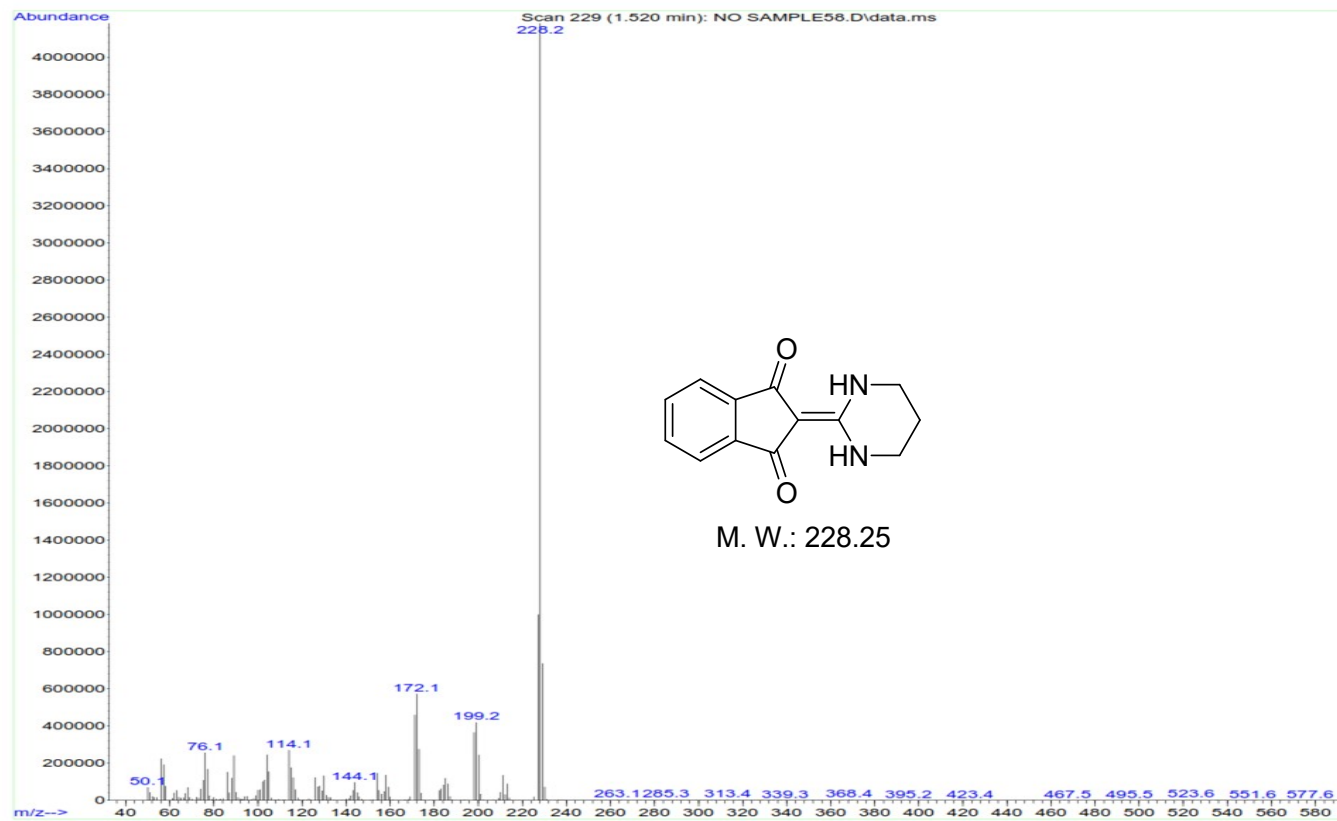

MS of 4d

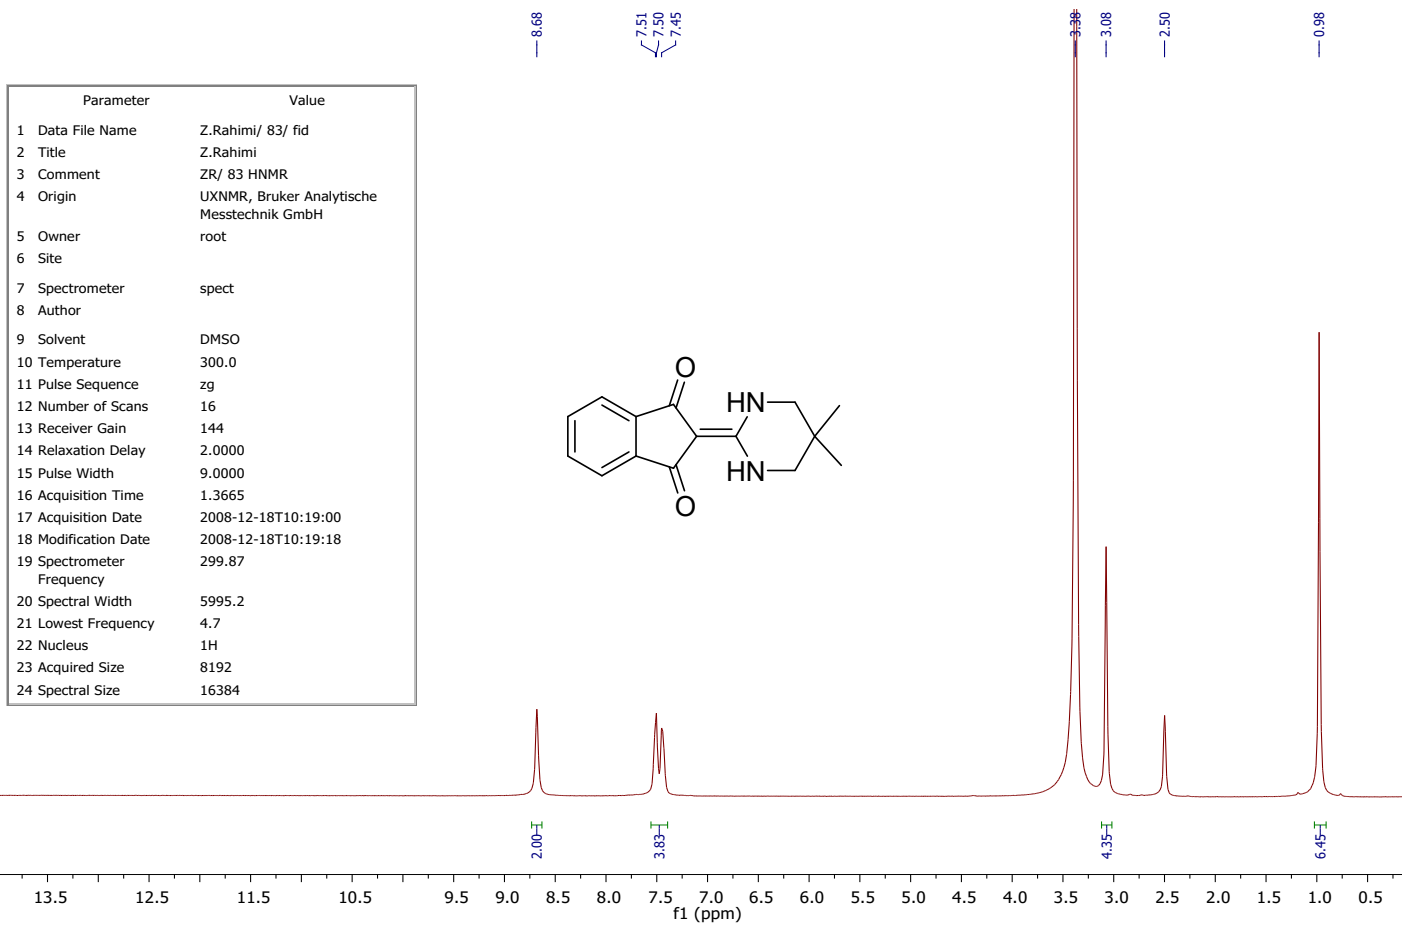**<sup>1</sup>H NMR of 4e**

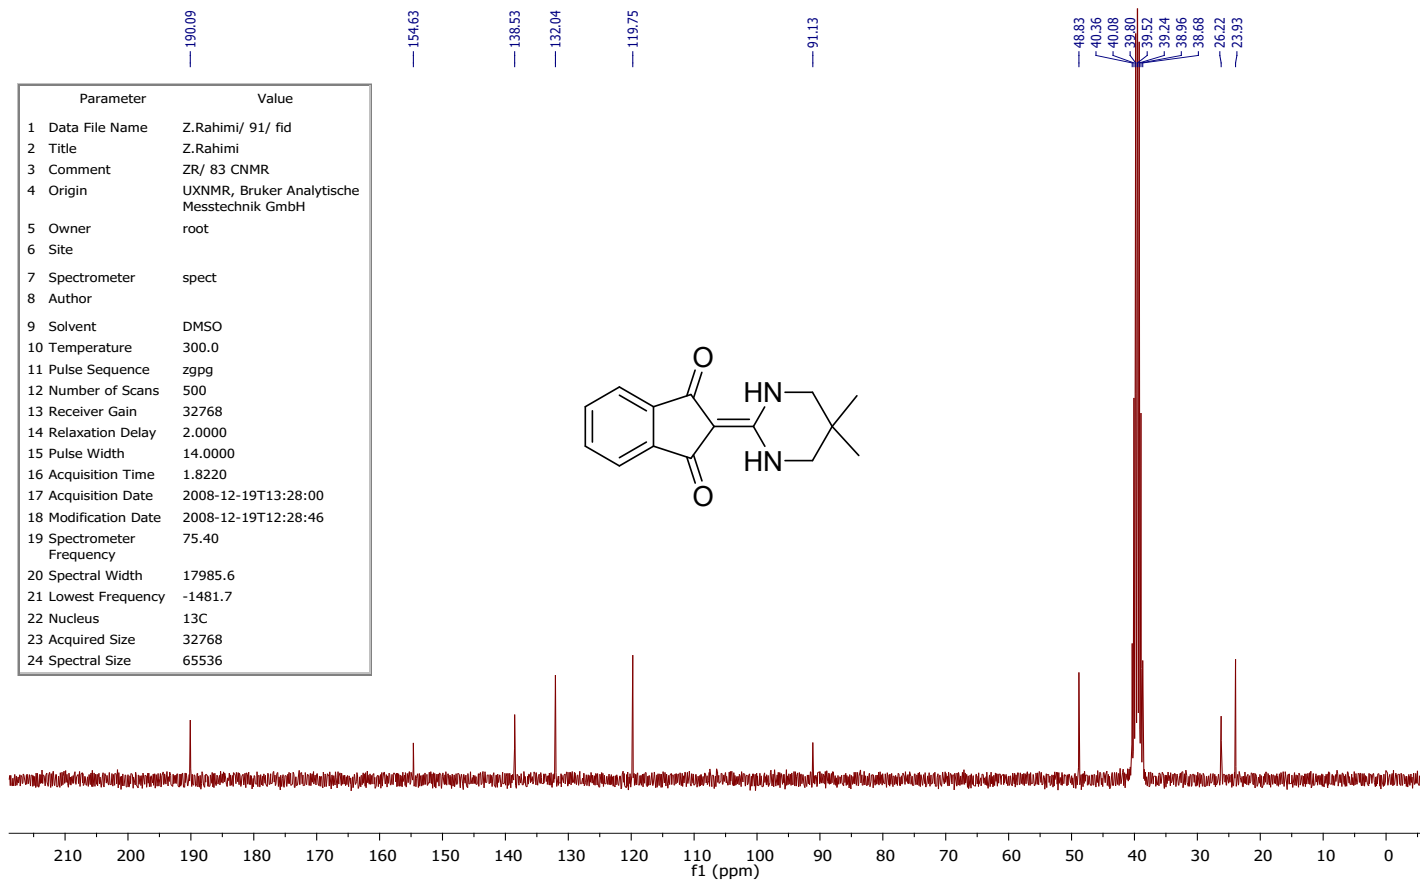**<sup>13</sup>C NMR of 4e**

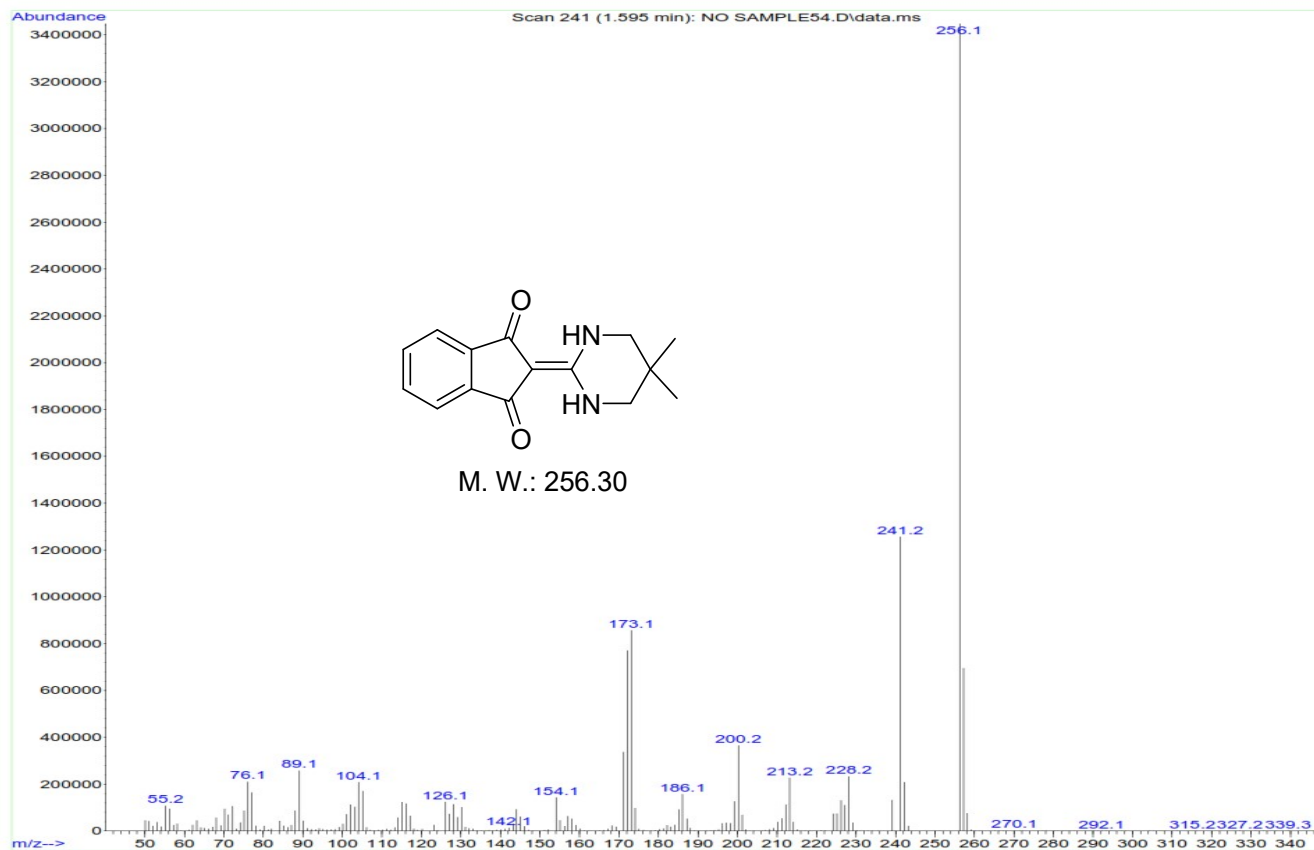

MS of 4e

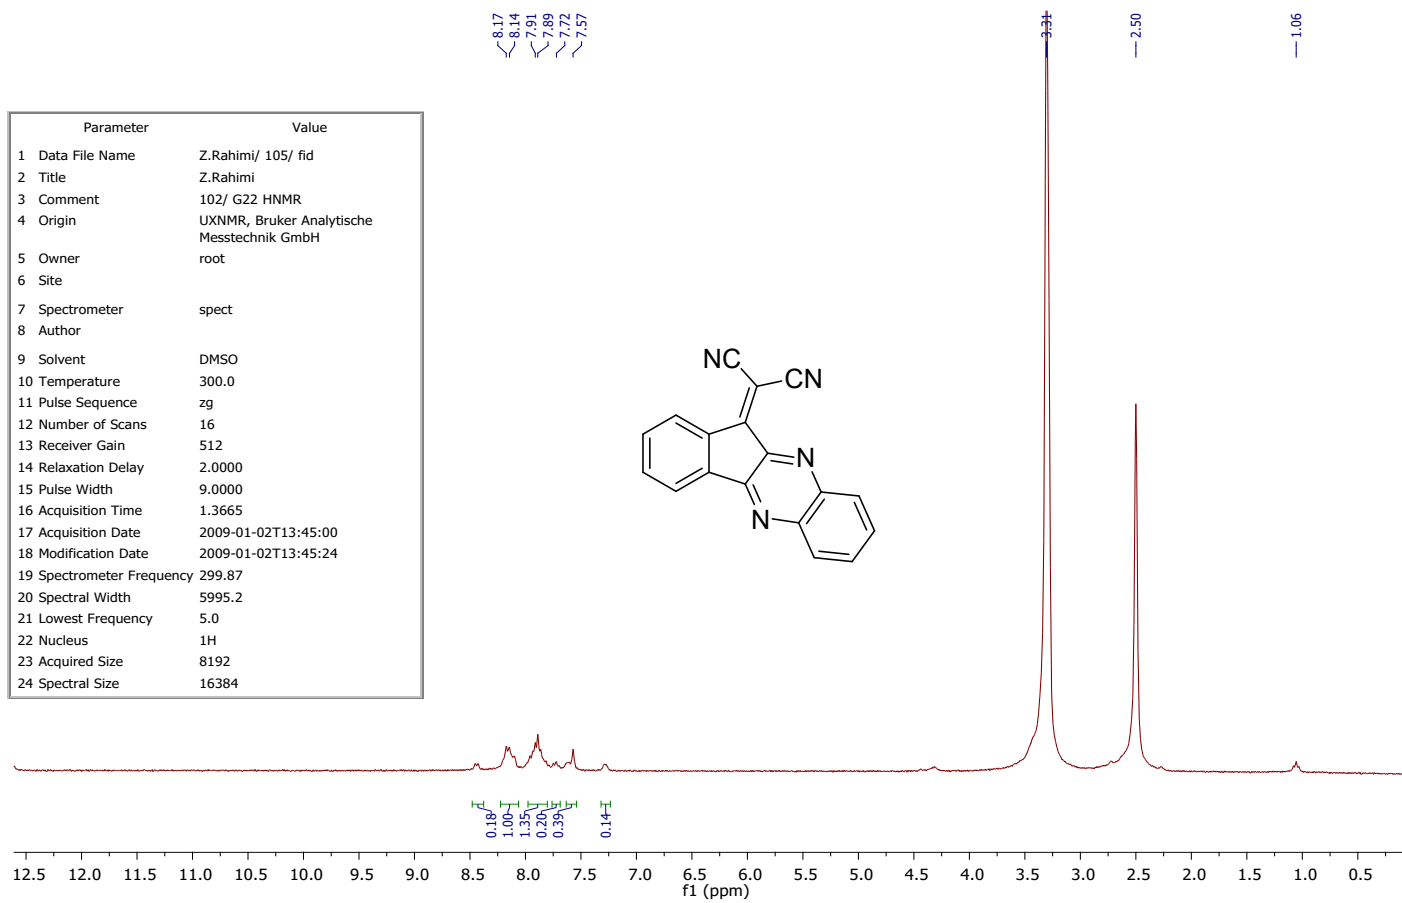

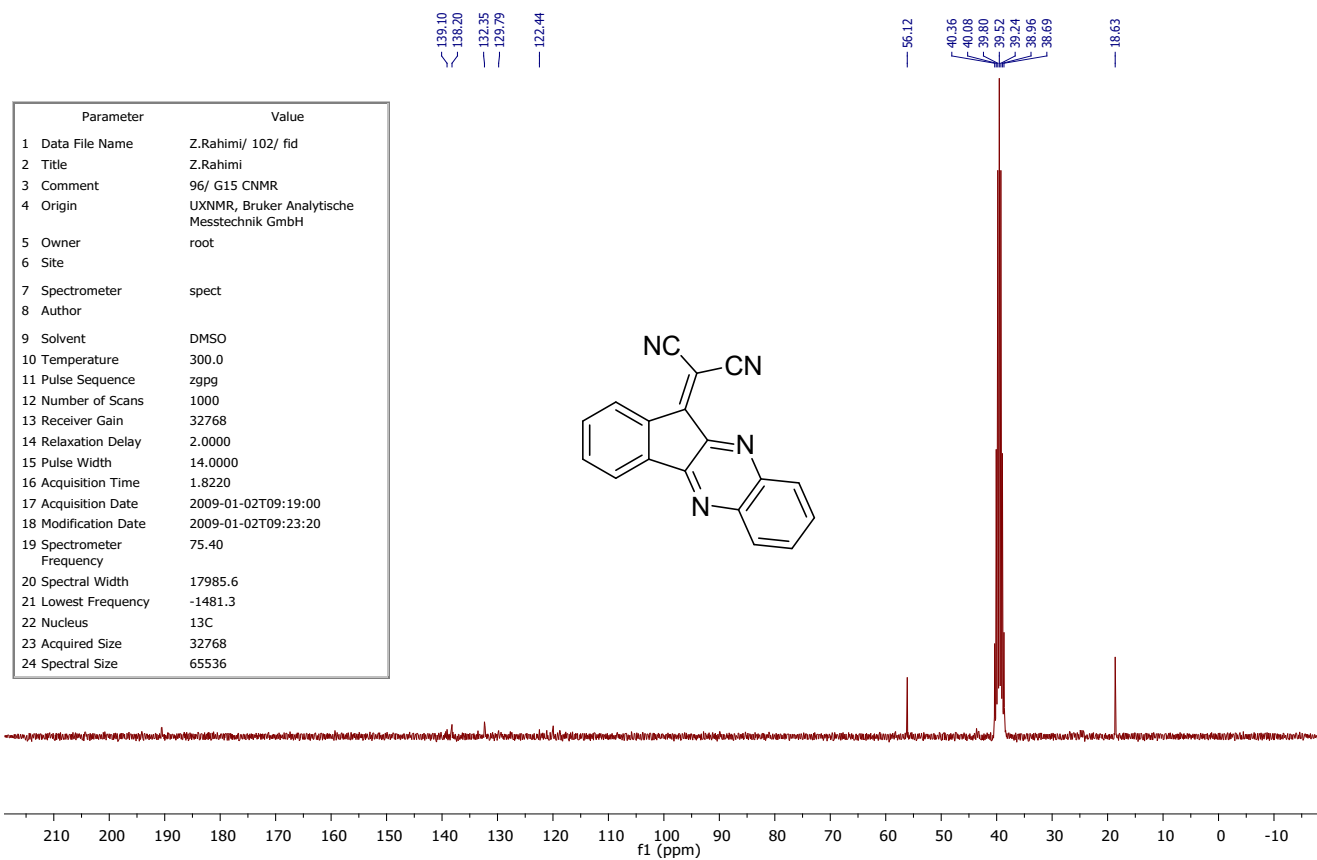**<sup>13</sup>C NMR of 6a**



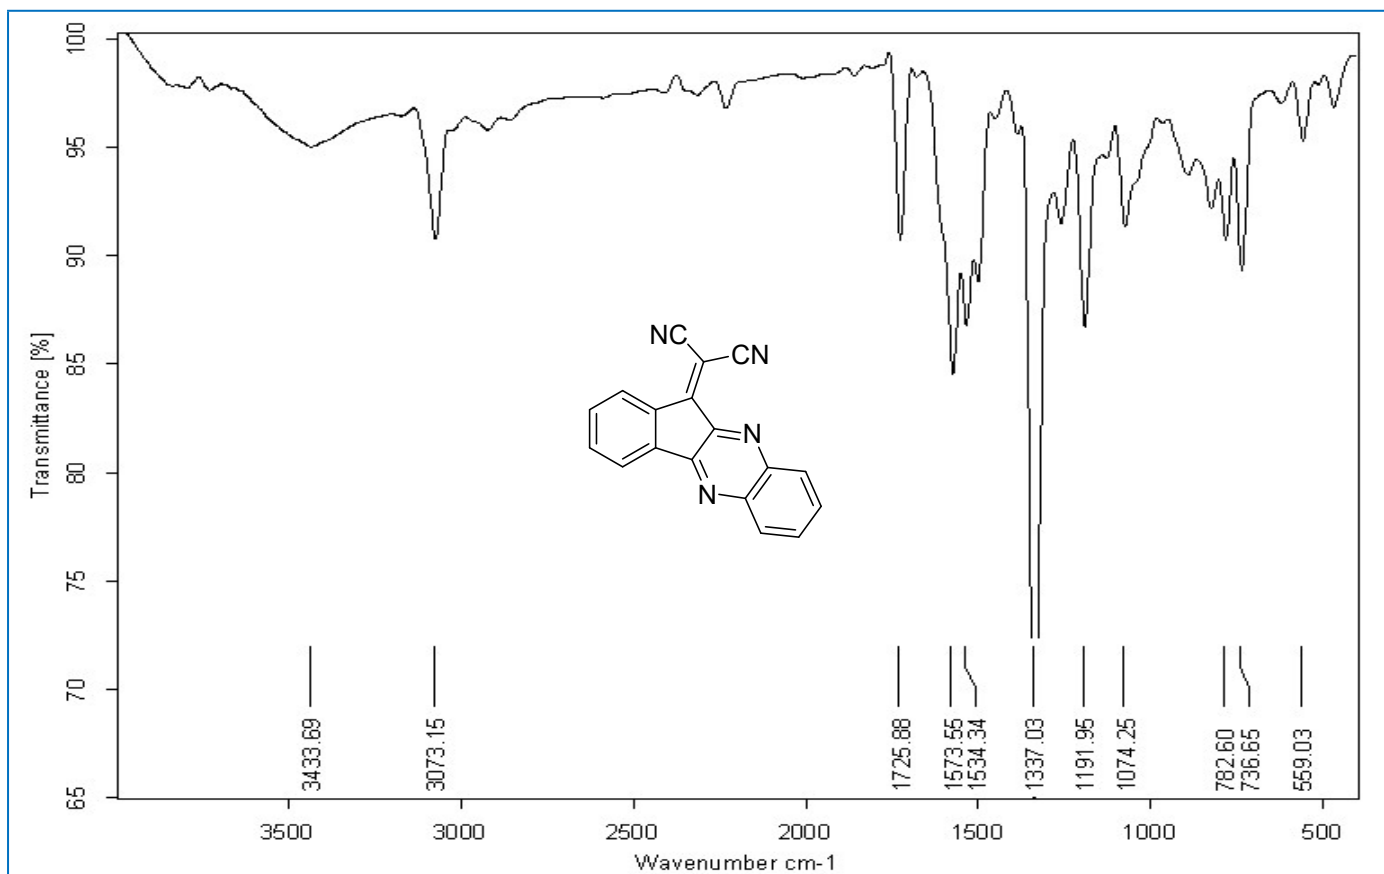**IR of 6a**

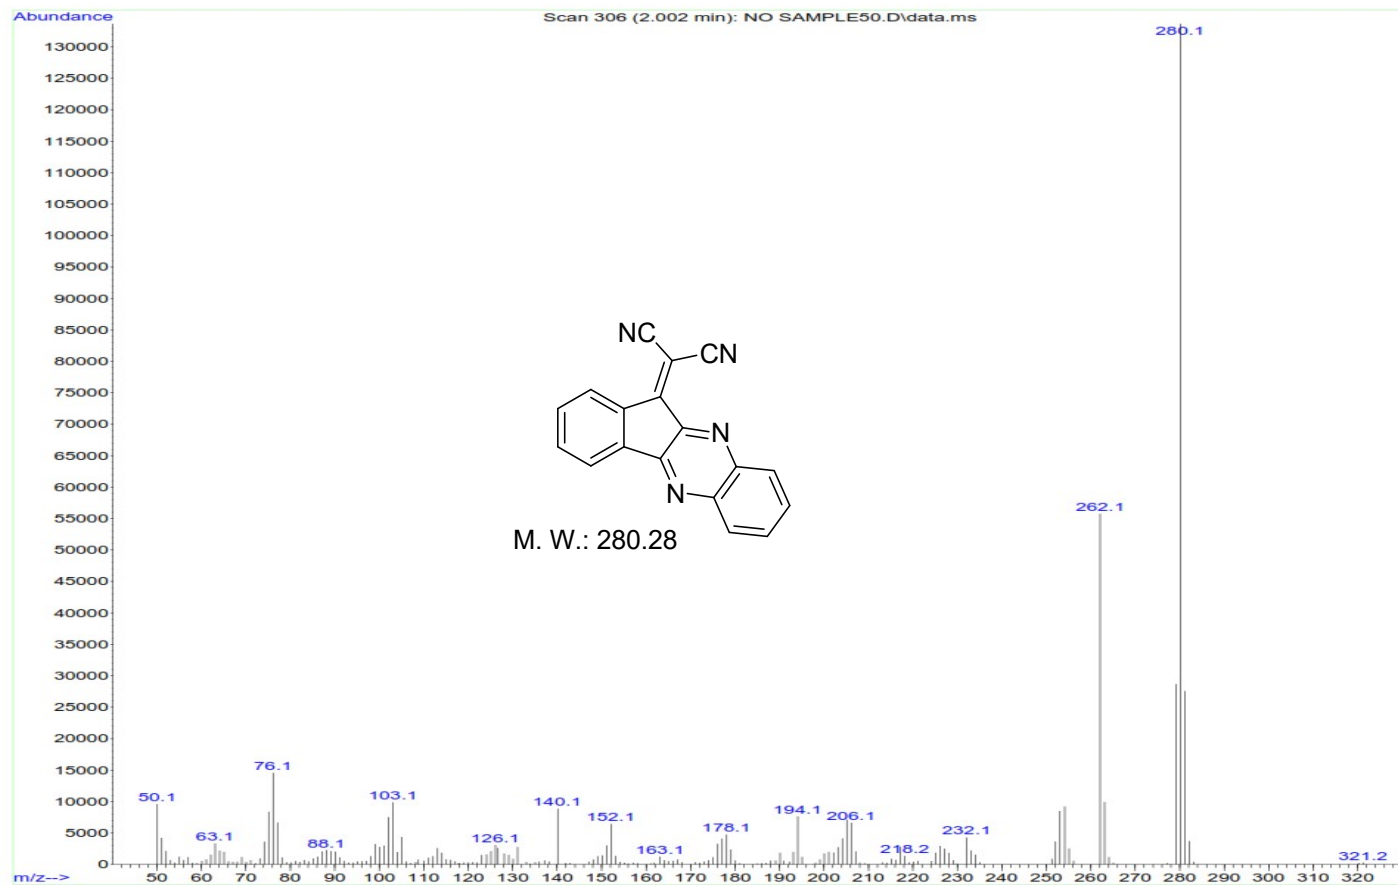

MS of 6a

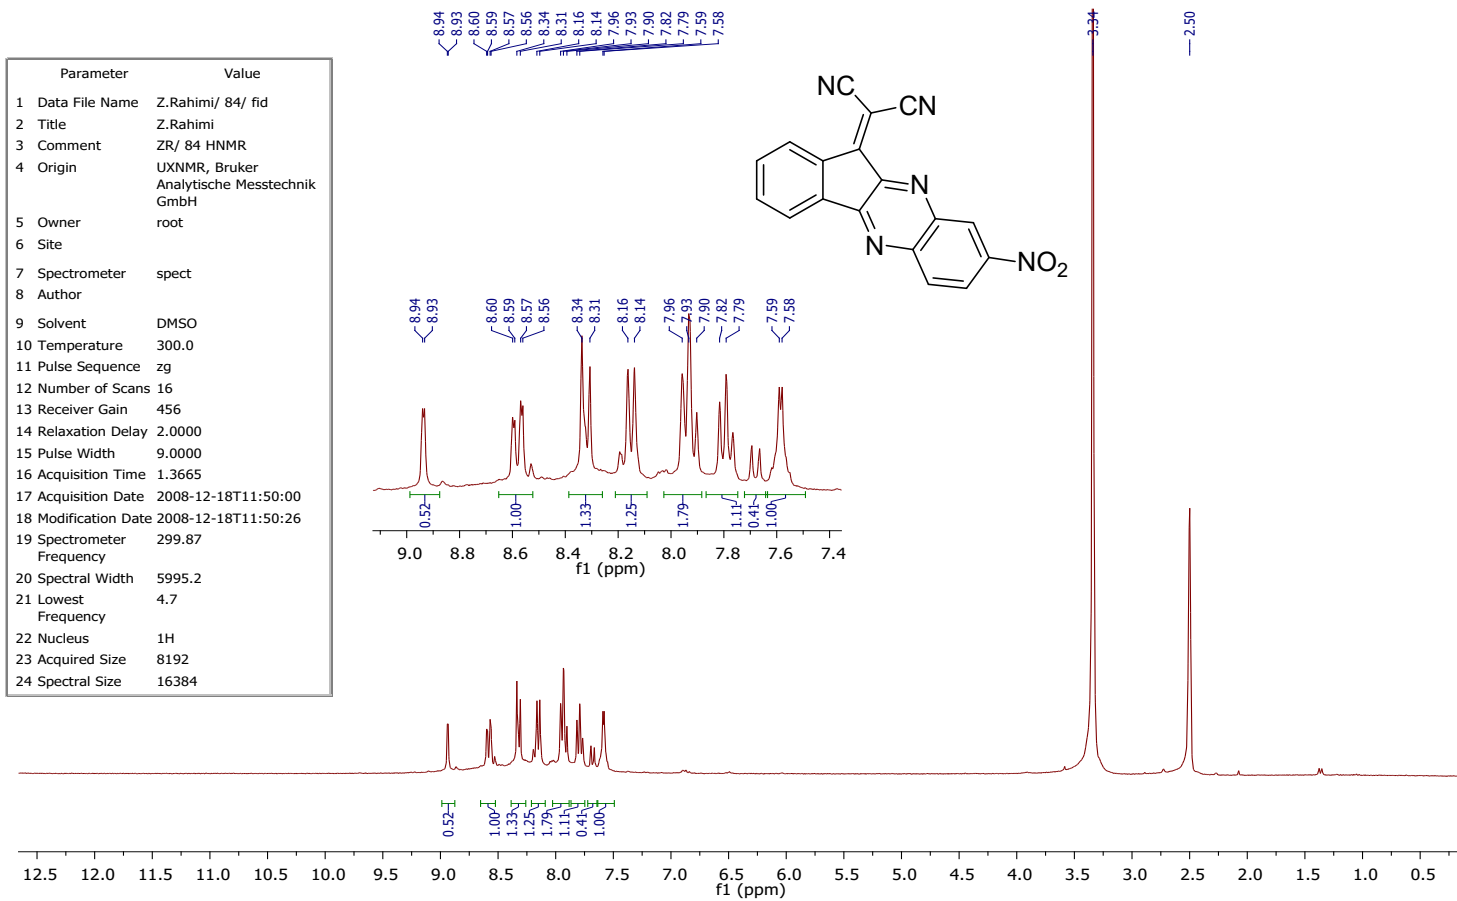**<sup>1</sup>H NMR of 6b**

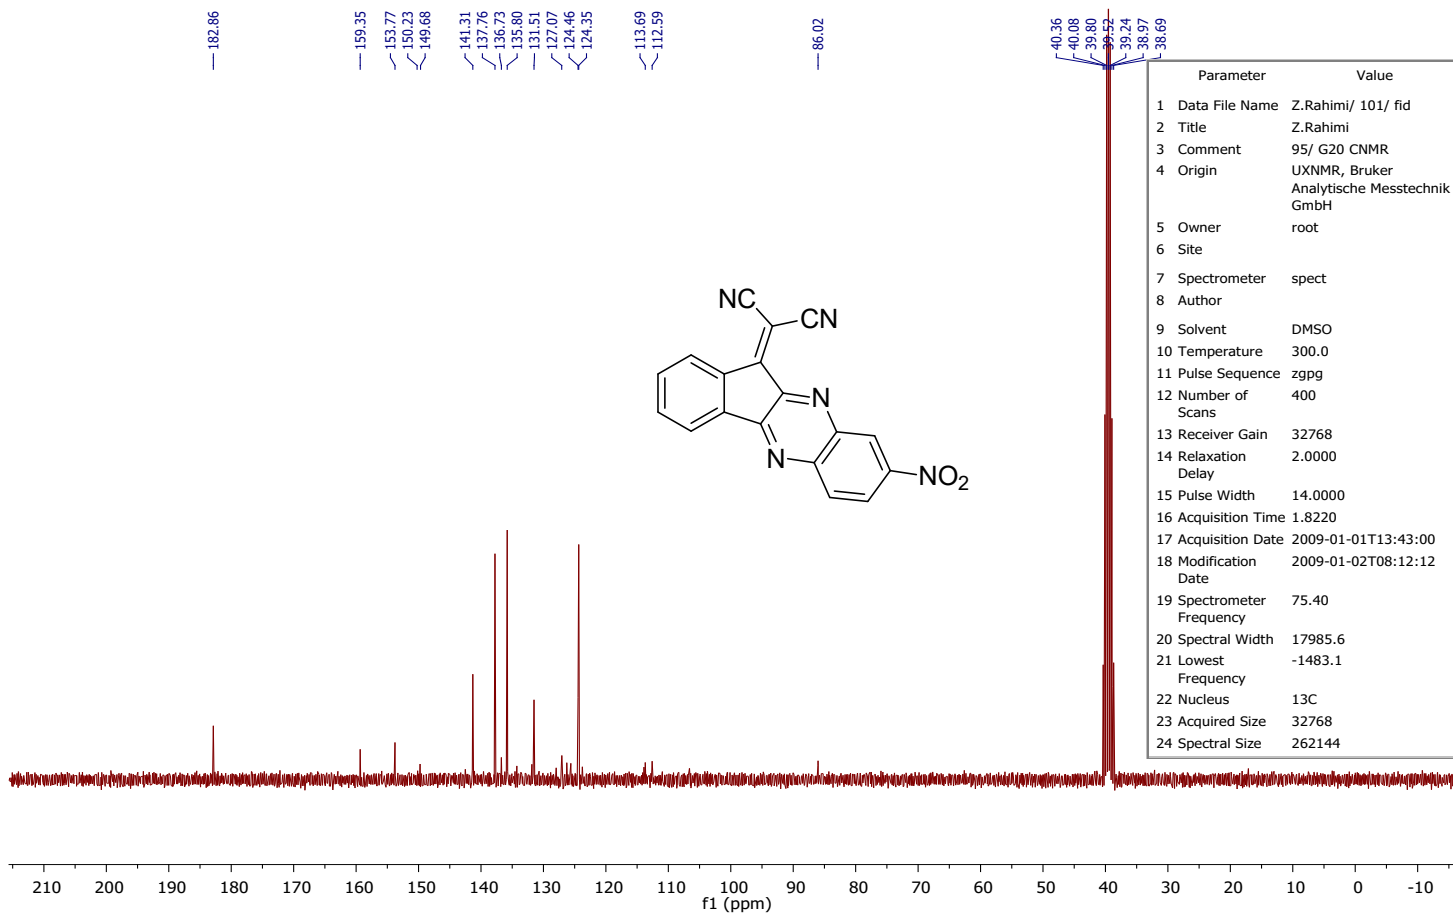

**<sup>13</sup>C NMR of 6b**

| Parameter                 | Value                                            |
|---------------------------|--------------------------------------------------|
| 1 Data File Name          | Z.Rahimi/ 101/ fid                               |
| 2 Title                   | Z.Rahimi                                         |
| 3 Comment                 | 95/ G20 CNMR                                     |
| 4 Origin                  | UXNMR, Bruker<br>Analytische Messtechnik<br>GmbH |
| 5 Owner                   | root                                             |
| 6 Site                    |                                                  |
| 7 Spectrometer            | spect                                            |
| 8 Author                  |                                                  |
| 9 Solvent                 | DMSO                                             |
| 10 Temperature            | 300.0                                            |
| 11 Pulse Sequence         | zgpg                                             |
| 12 Number of Scans        | 400                                              |
| 13 Receiver Gain          | 32768                                            |
| 14 Relaxation Delay       | 2.0000                                           |
| 15 Pulse Width            | 14.0000                                          |
| 16 Acquisition Time       | 1.8220                                           |
| 17 Acquisition Date       | 2009-01-01T13:43:00                              |
| 18 Modification Date      | 2009-01-02T08:12:12                              |
| 19 Spectrometer Frequency | 75.40                                            |
| 20 Spectral Width         | 17985.6                                          |
| 21 Lowest Frequency       | -1483.1                                          |
| 22 Nucleus                | <sup>13</sup> C                                  |
| 23 Acquired Size          | 32768                                            |
| 24 Spectral Size          | 262144                                           |

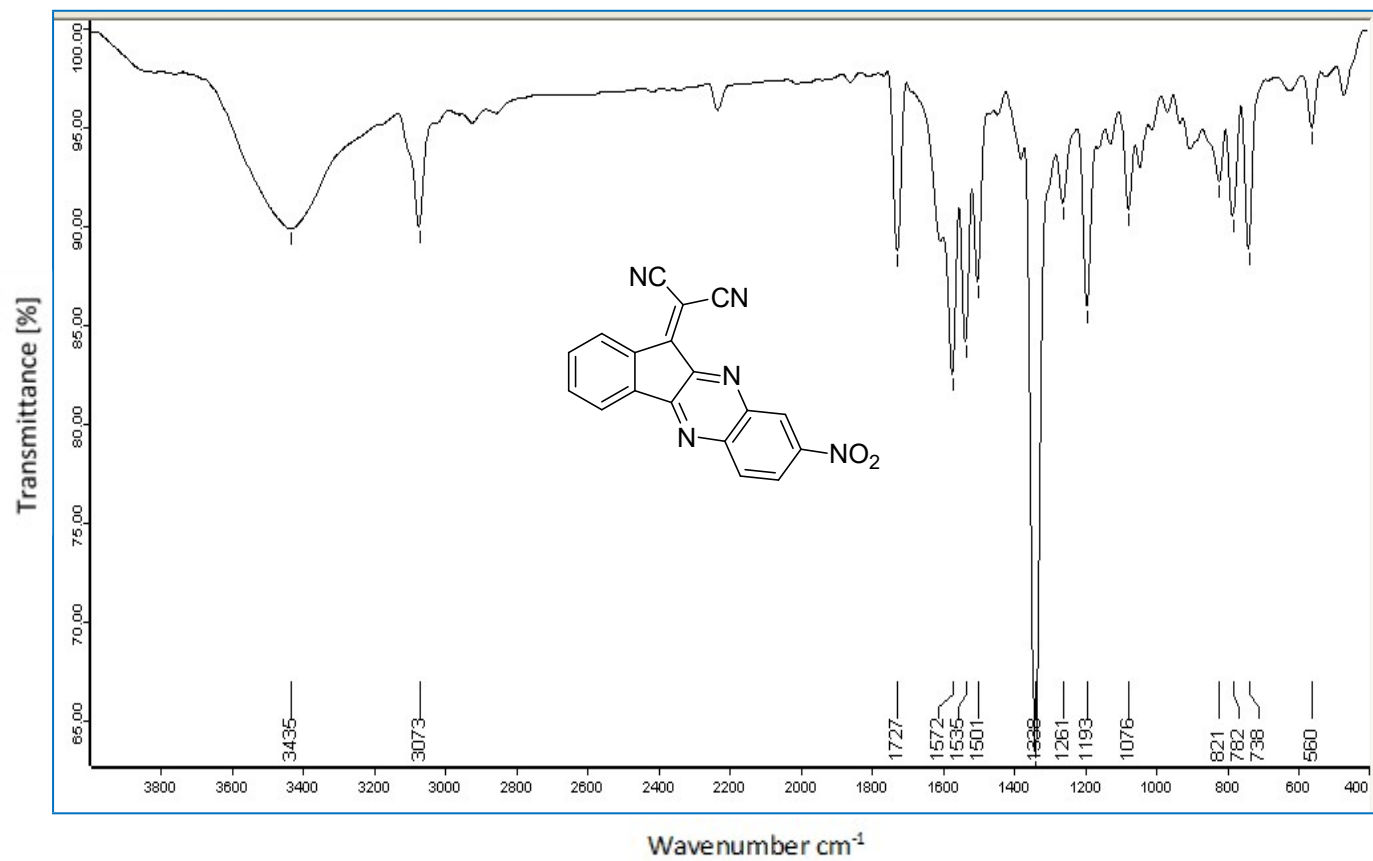

IR of 6b

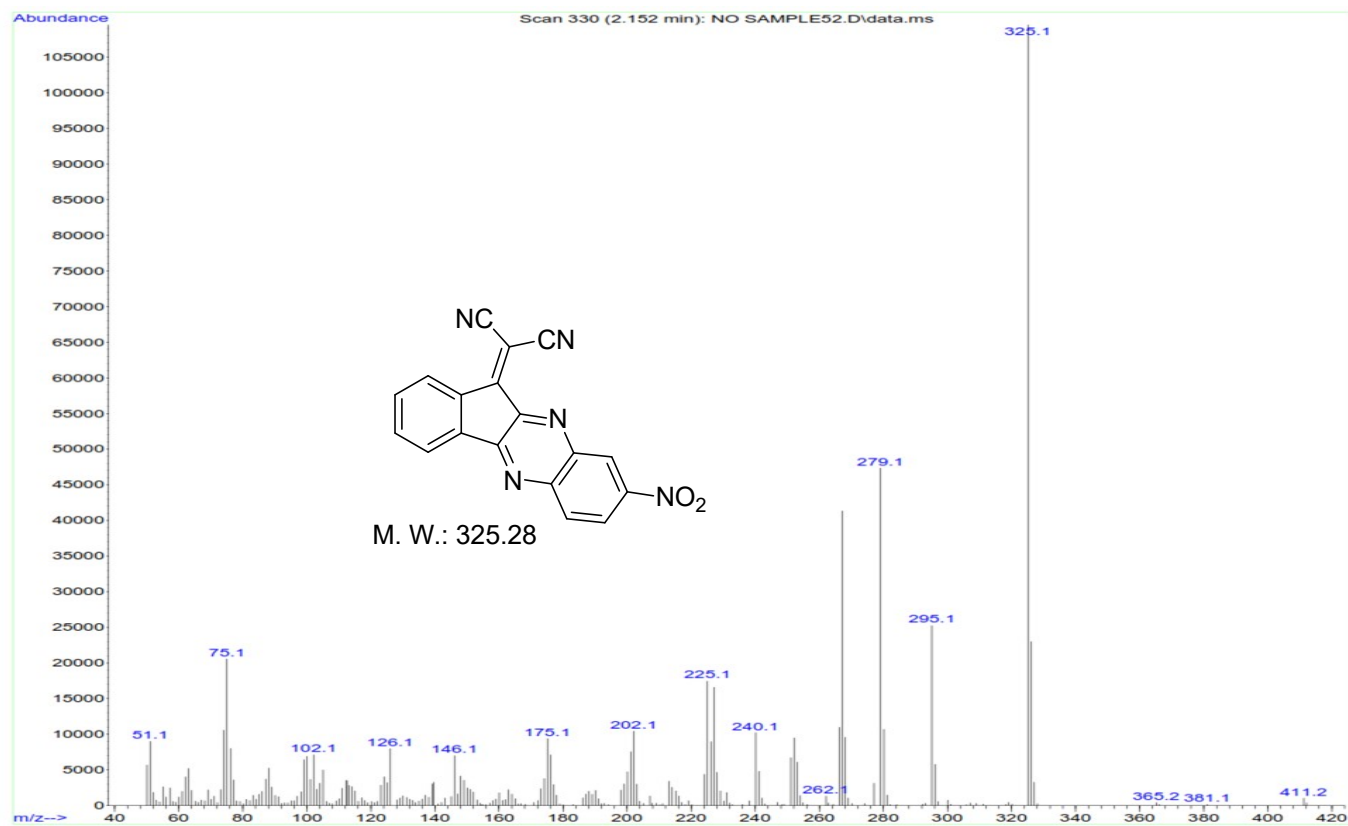

MS of 6b

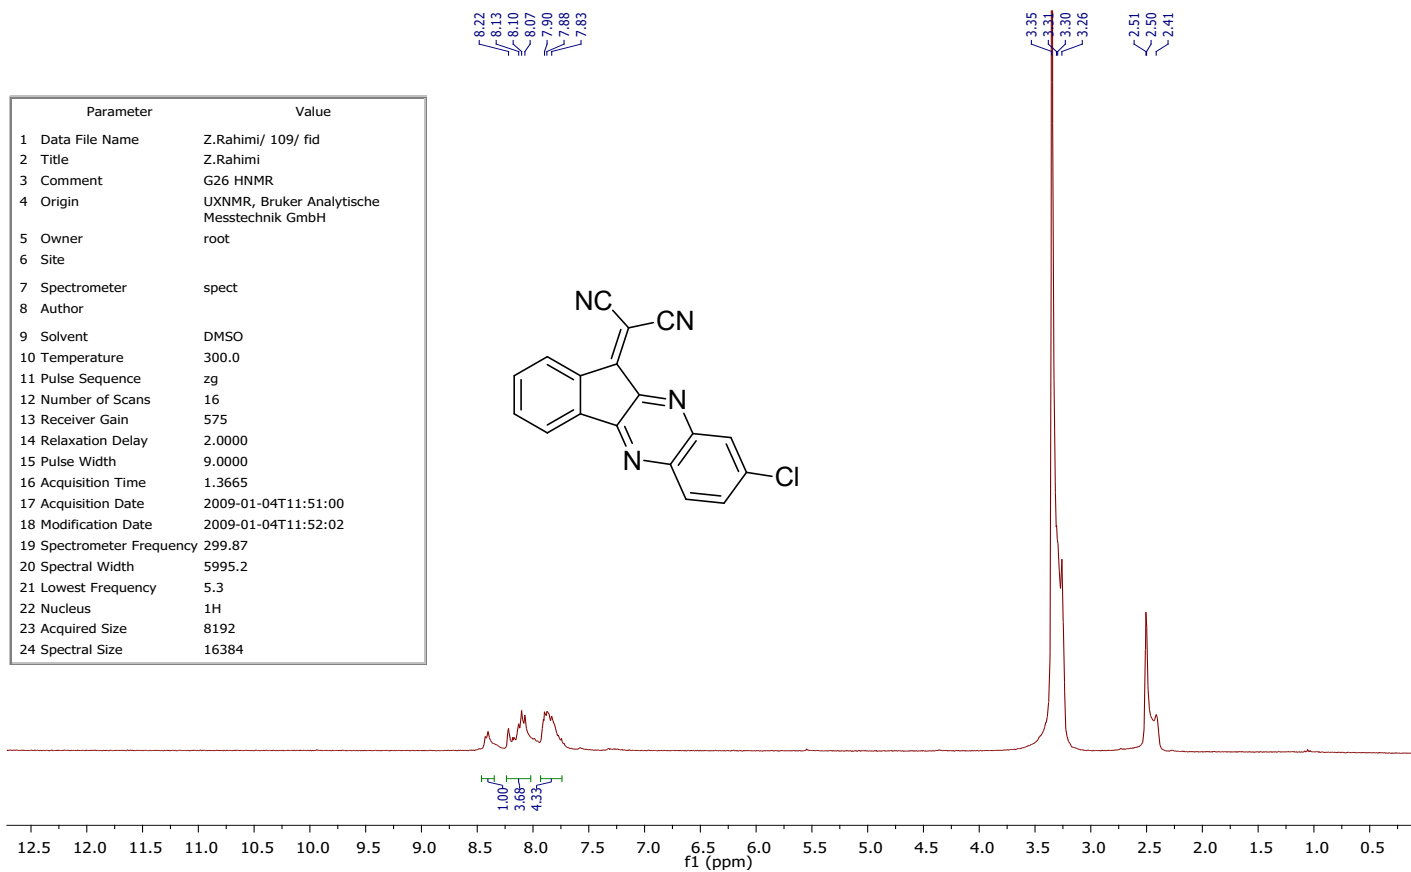 $^1\text{H}$  NMR of 6c

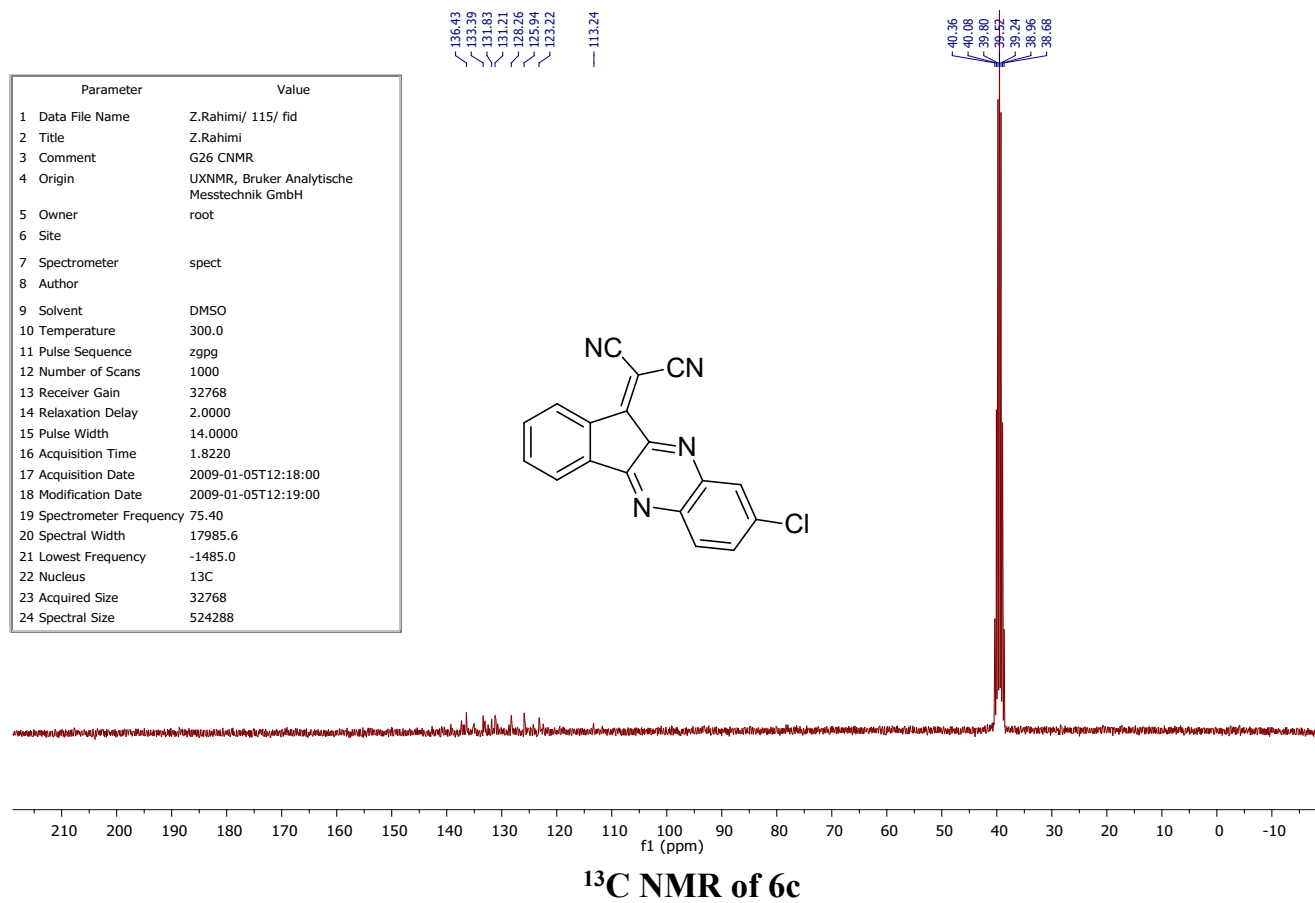



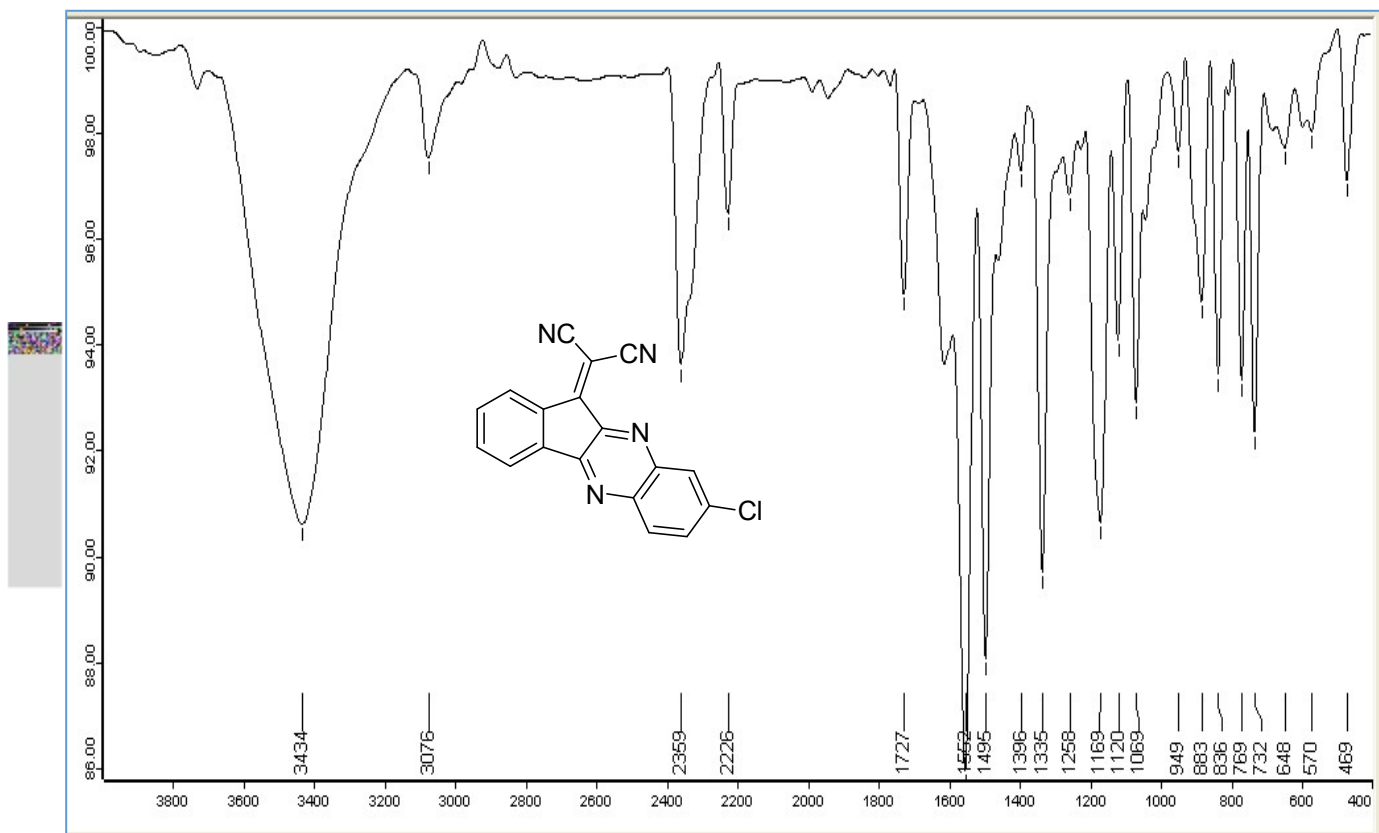

IR of 6c

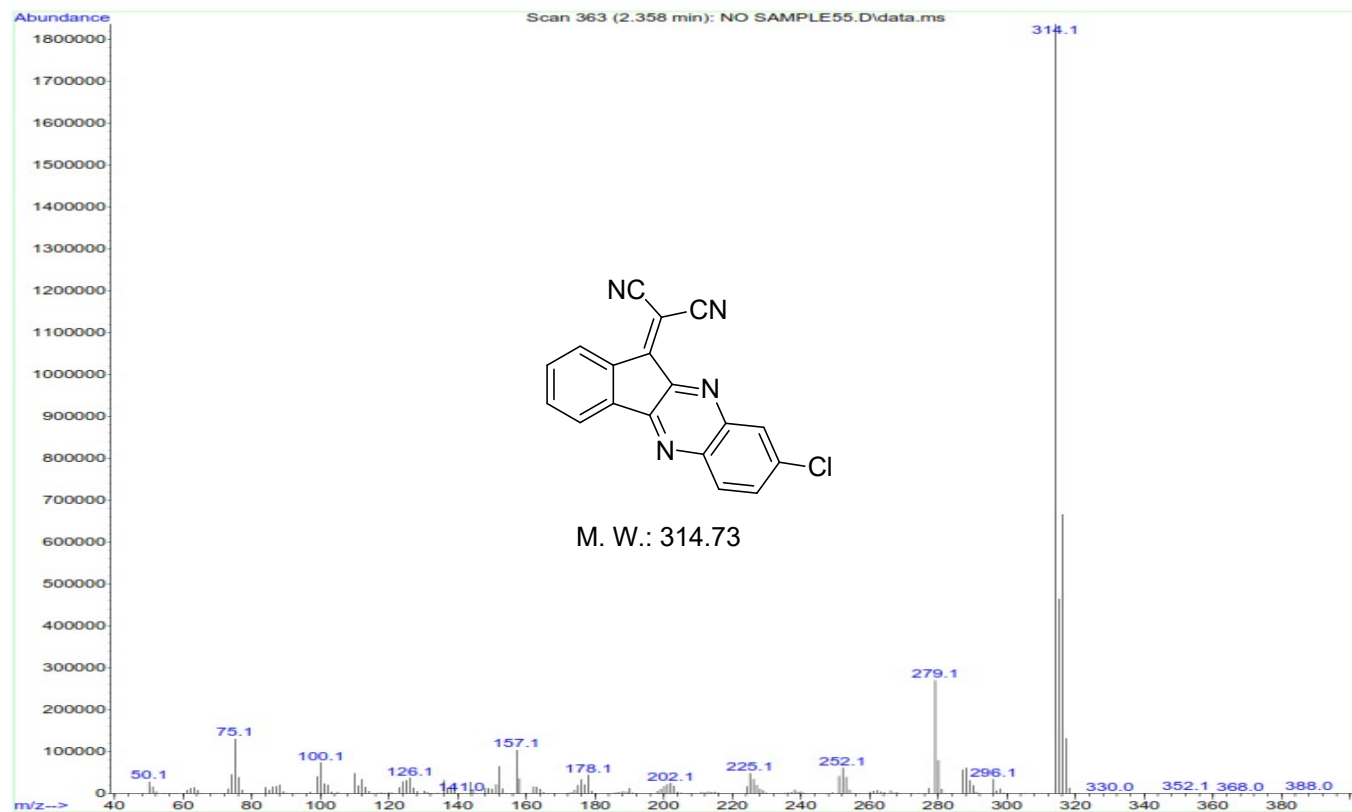

MS of 6c

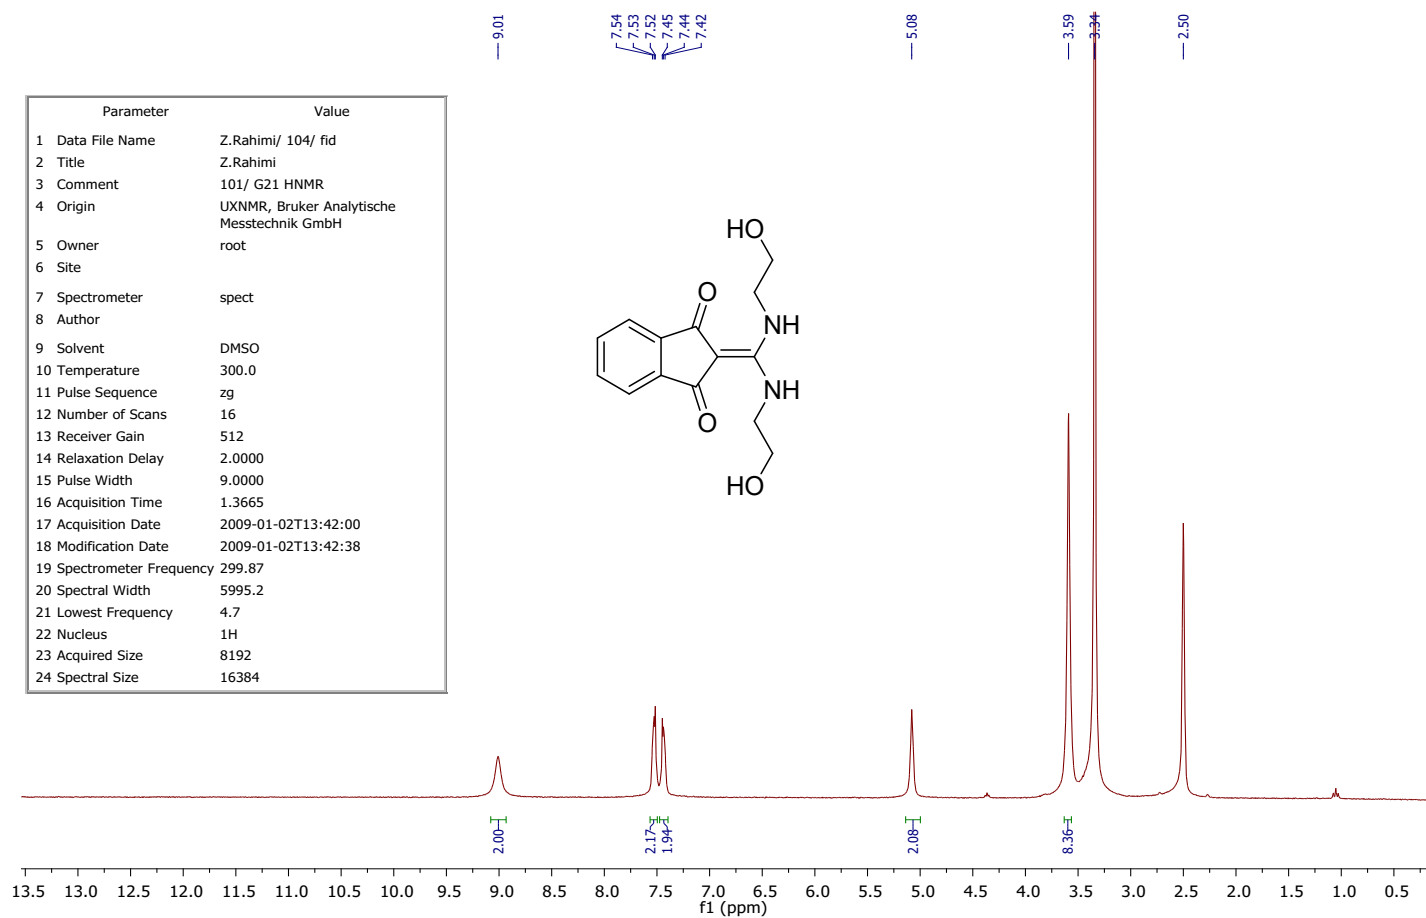**<sup>1</sup>H NMR of 8**

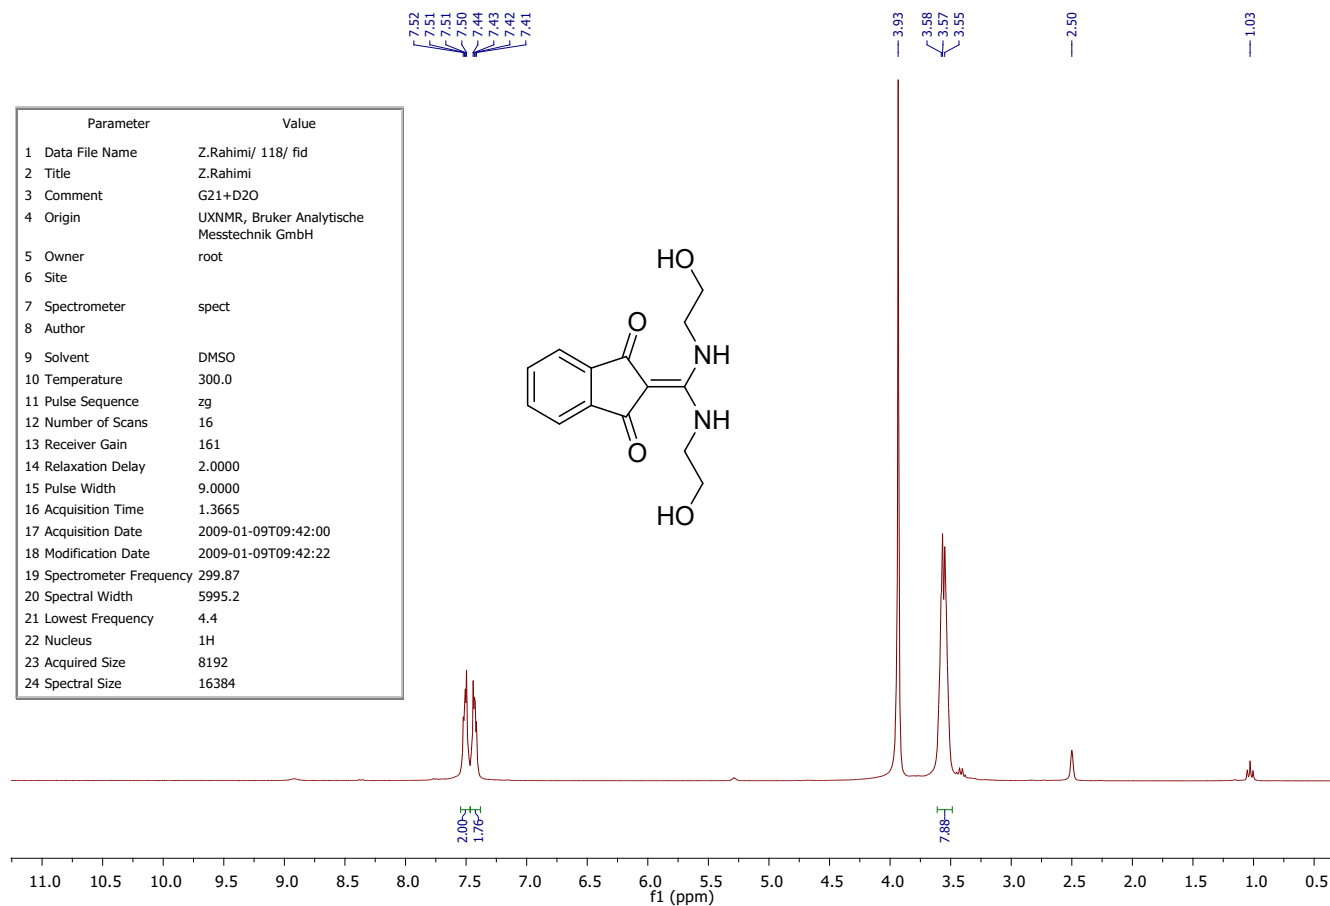

**$^1\text{H}$ -NMR with  $\text{D}_2\text{O}$  exchange of 8**

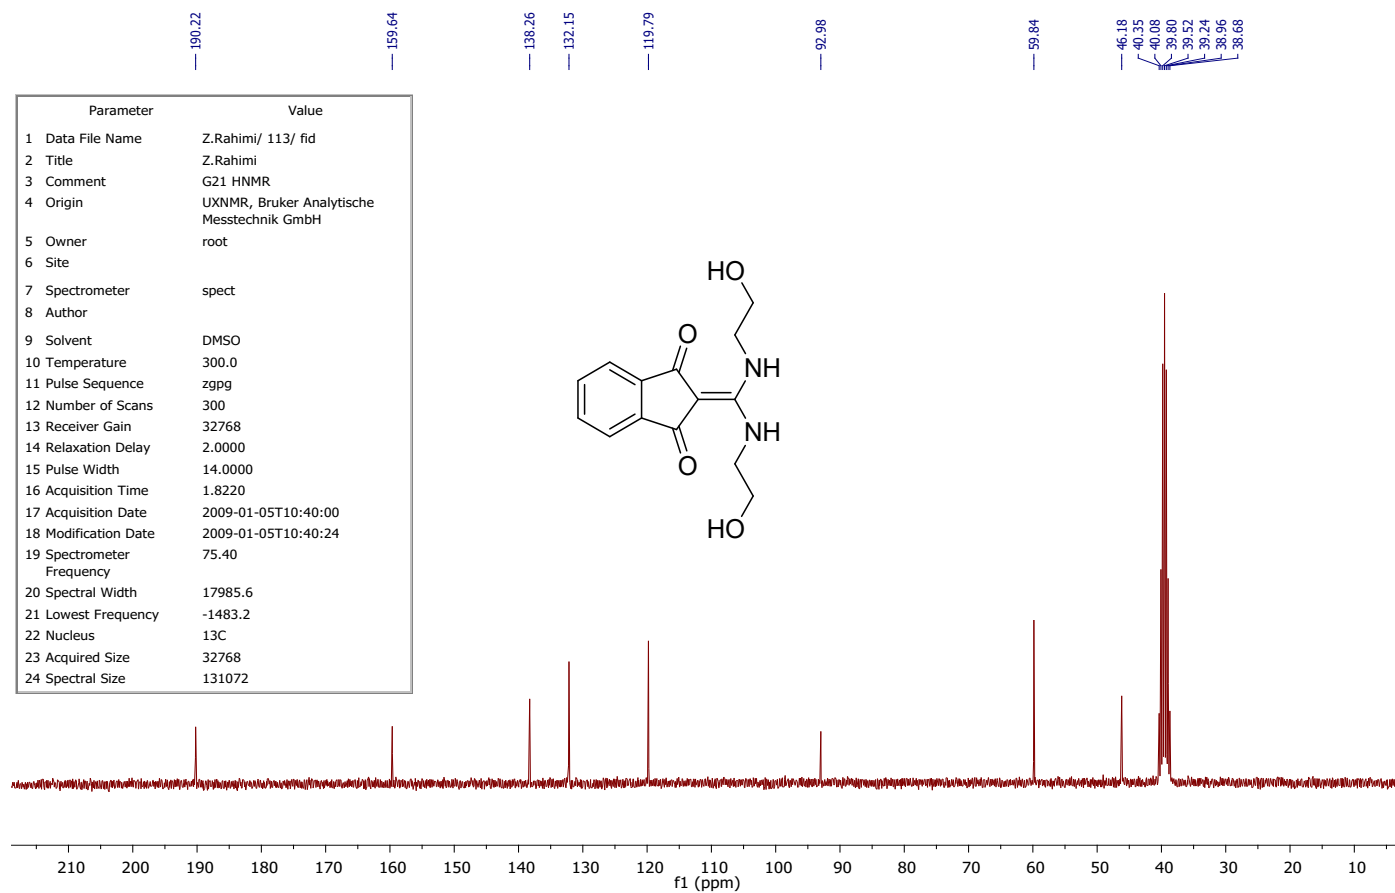**<sup>13</sup>C NMR of 8**

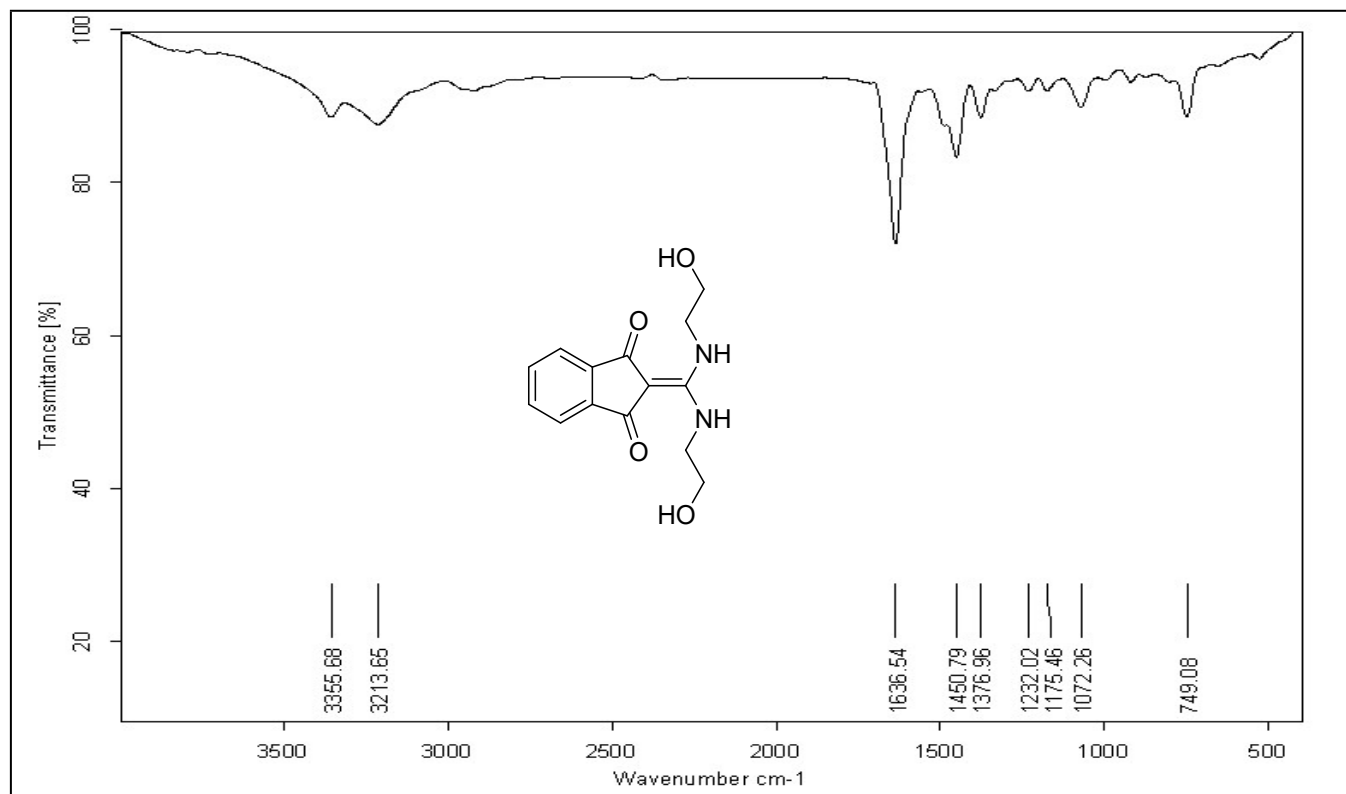**IR of 8**

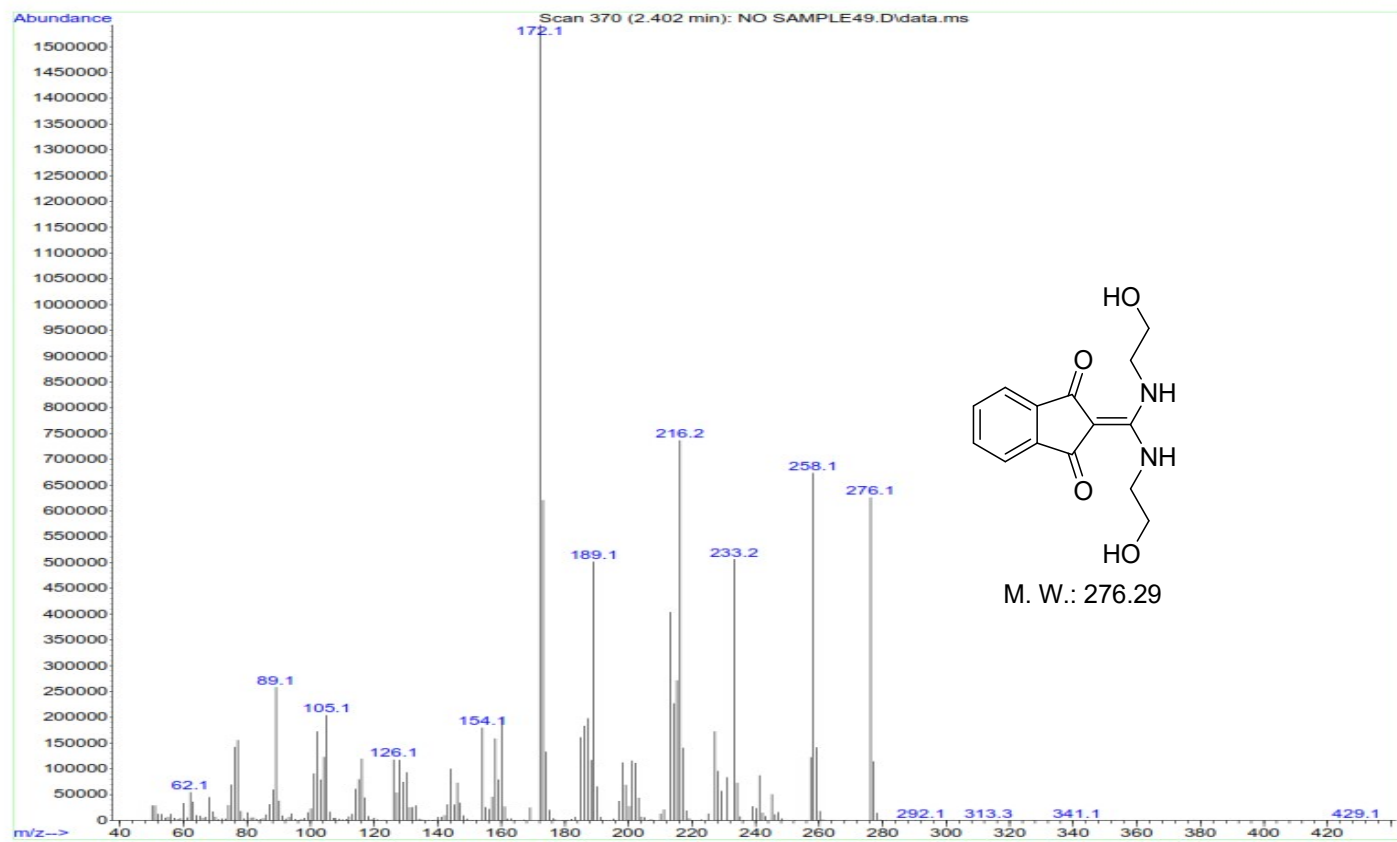

MS of 8

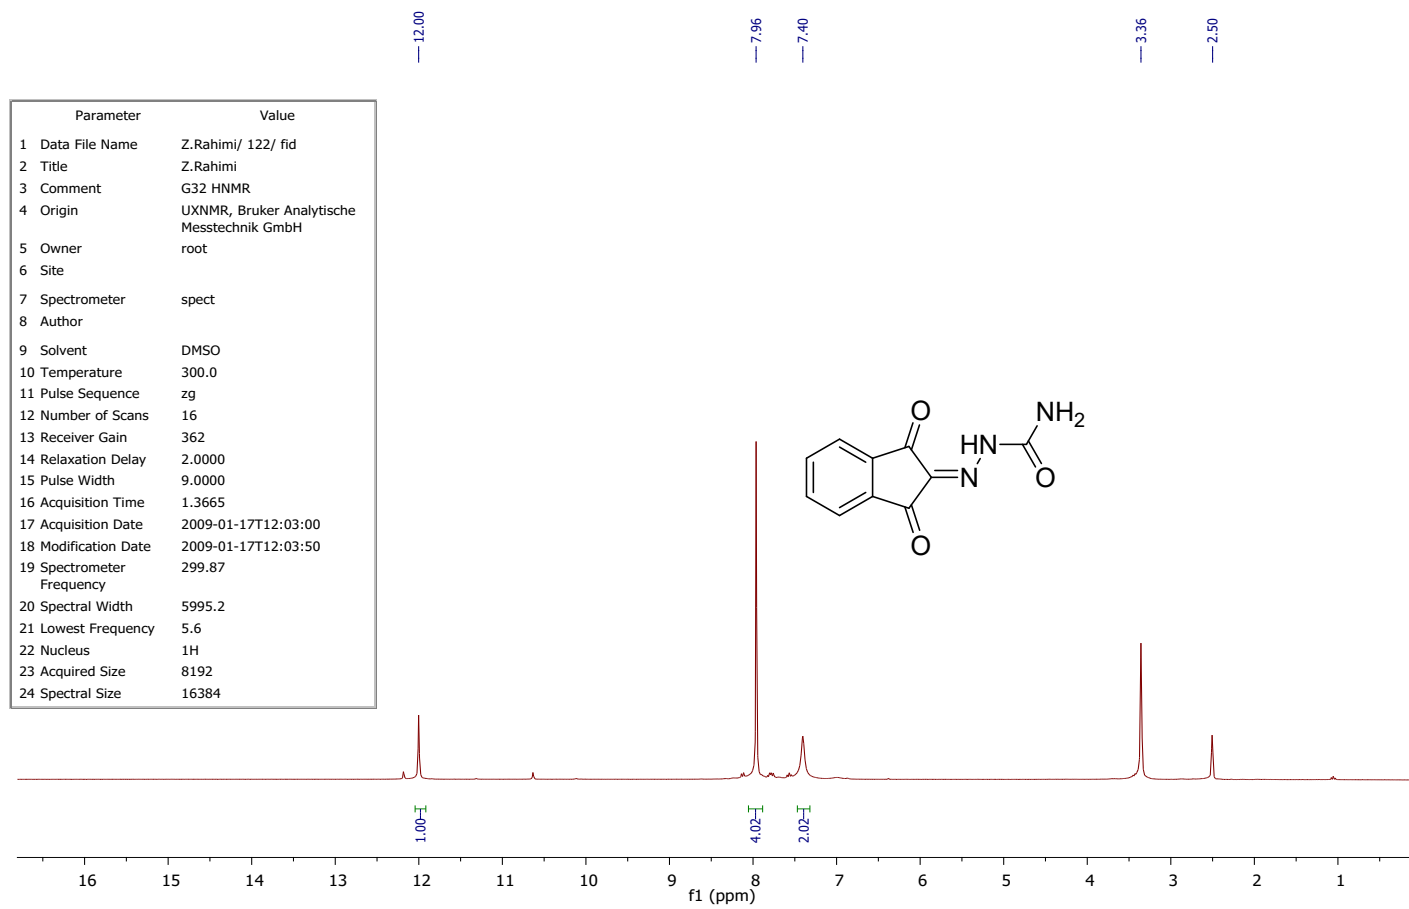**<sup>1</sup>H NMR of 10**



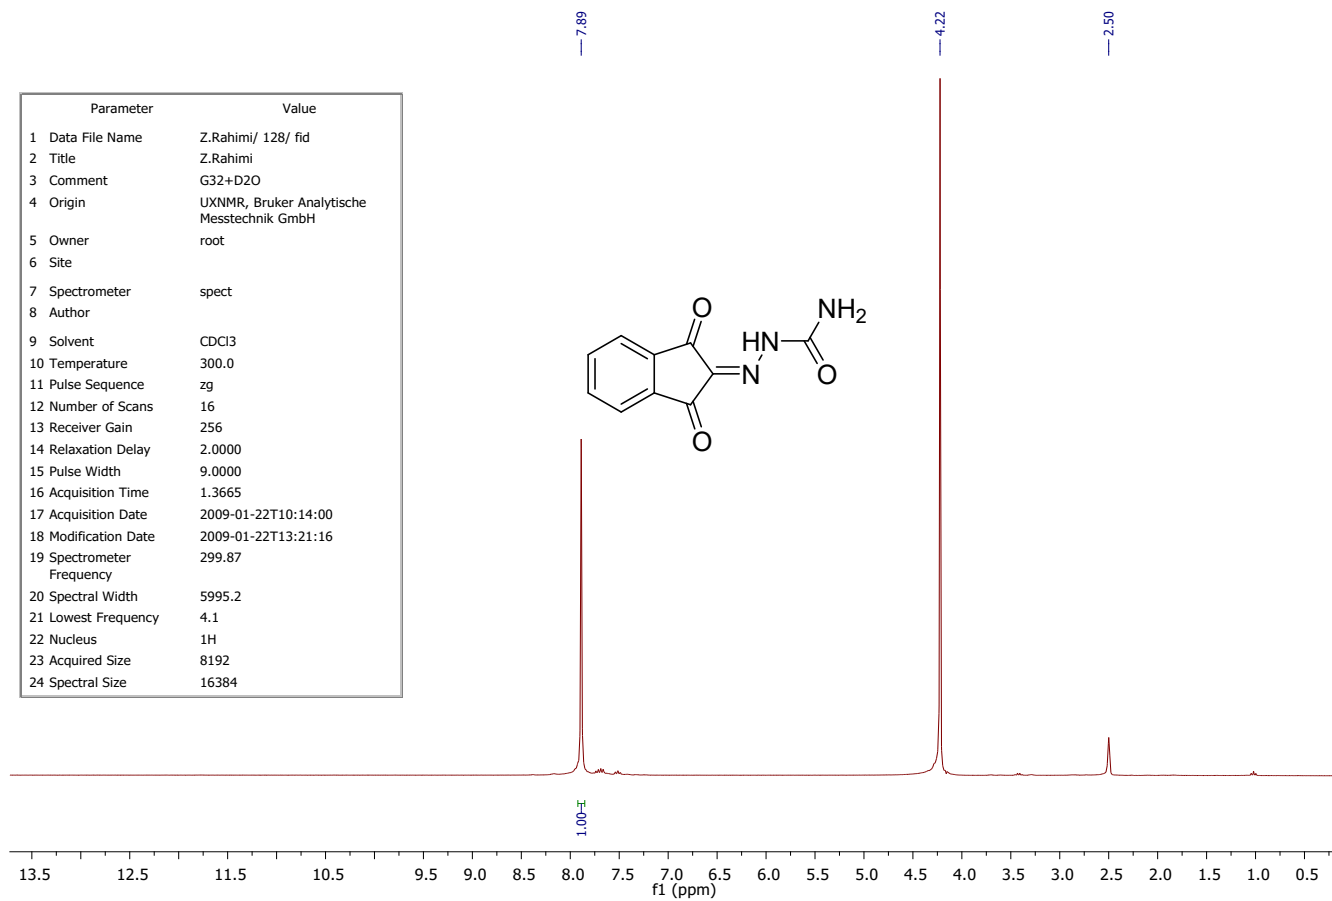

**<sup>1</sup>H-NMR with D<sub>2</sub>O exchange of 10**

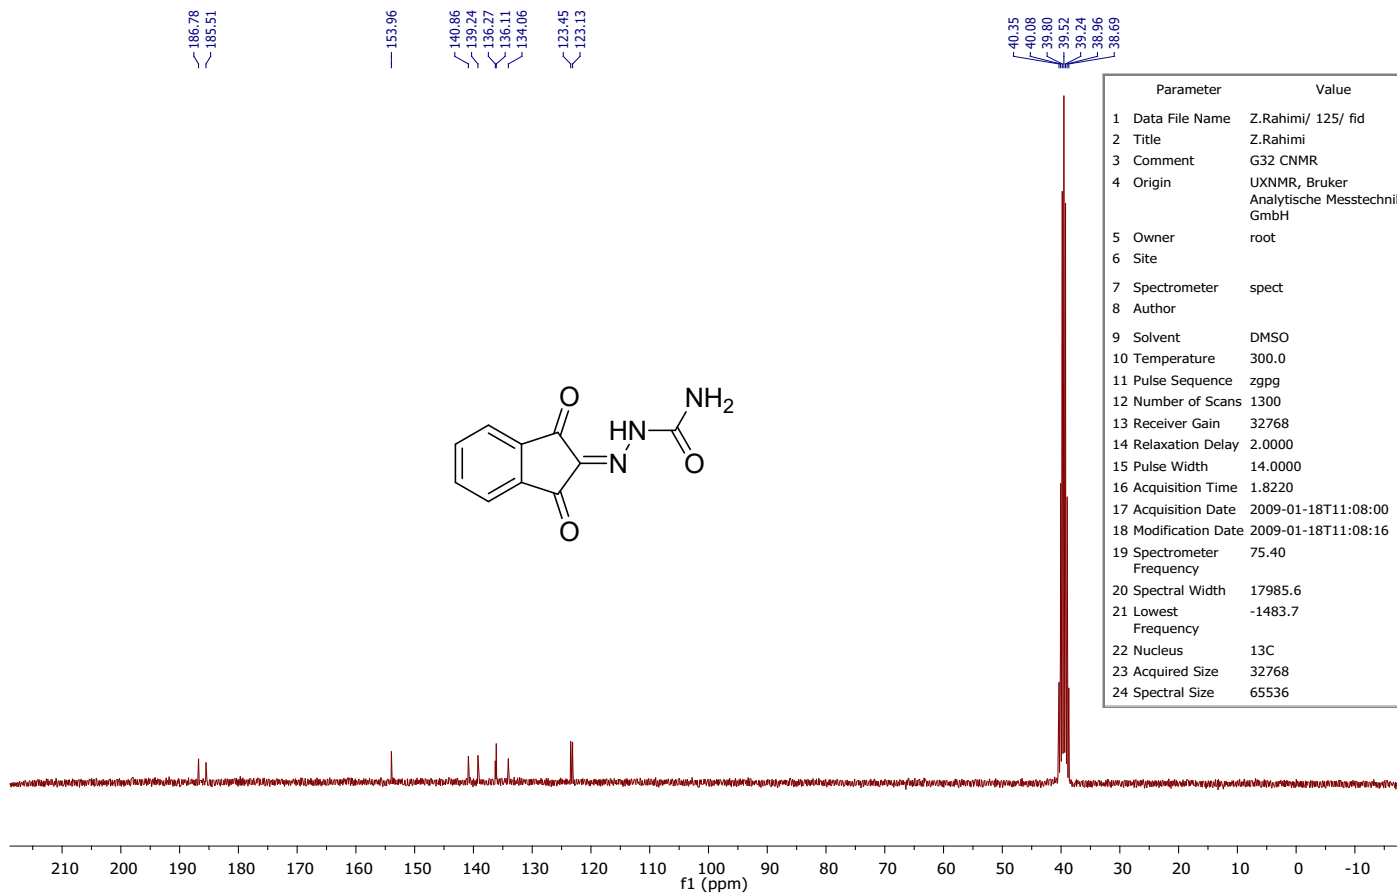

**<sup>13</sup>C NMR of 10**

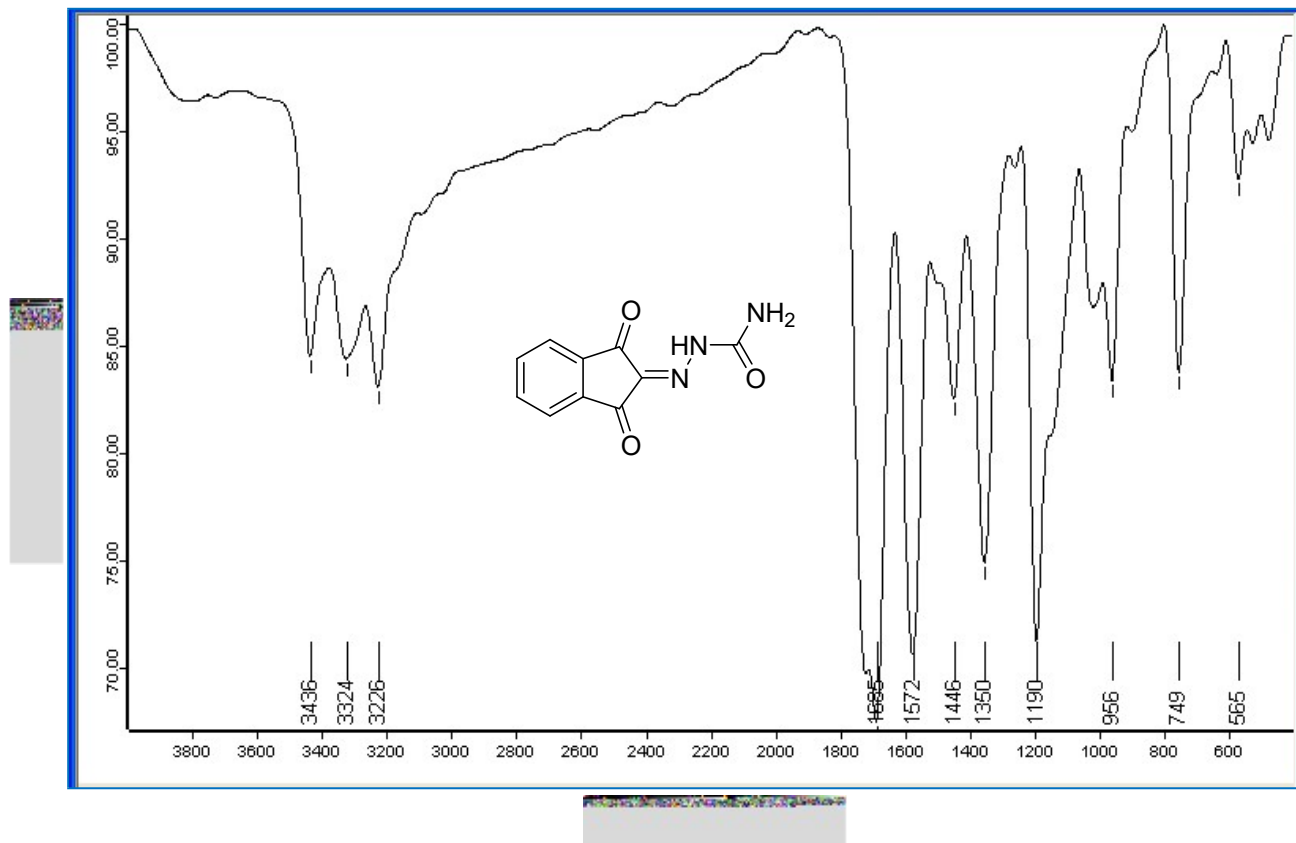

IR of 10

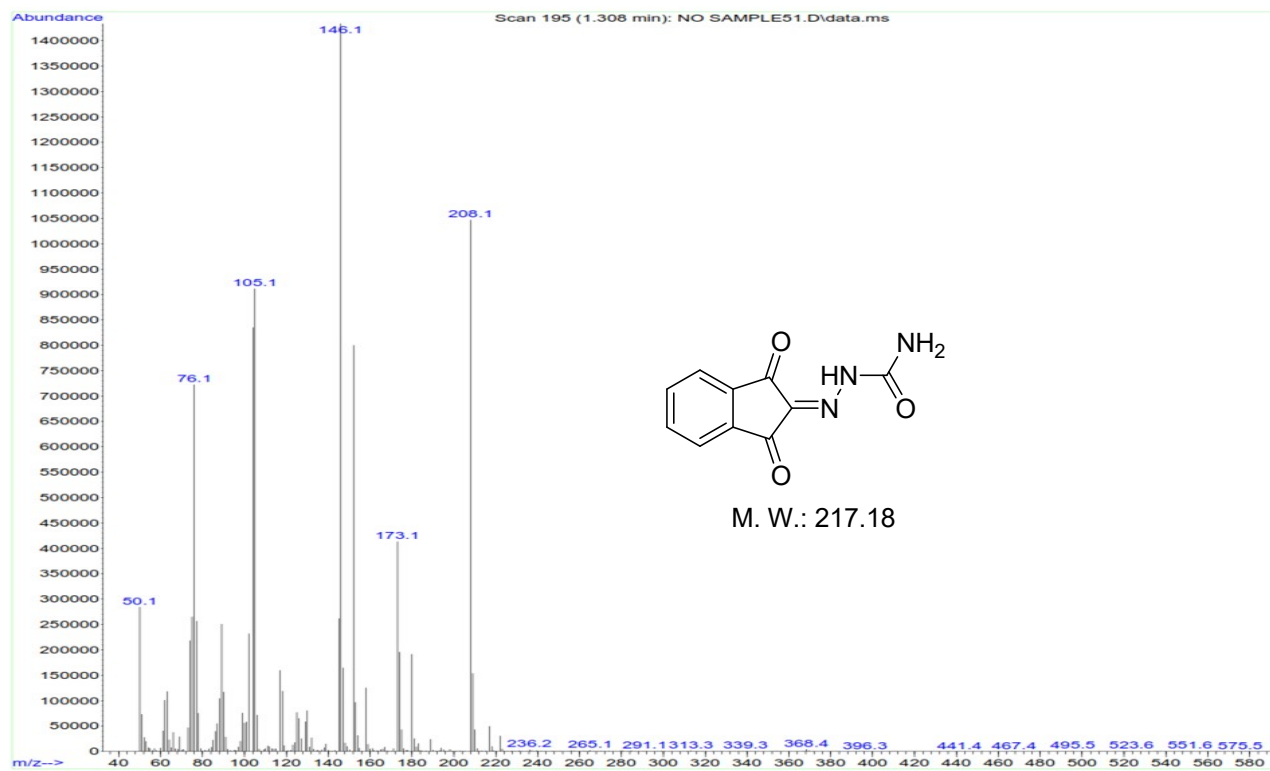

MS of 10

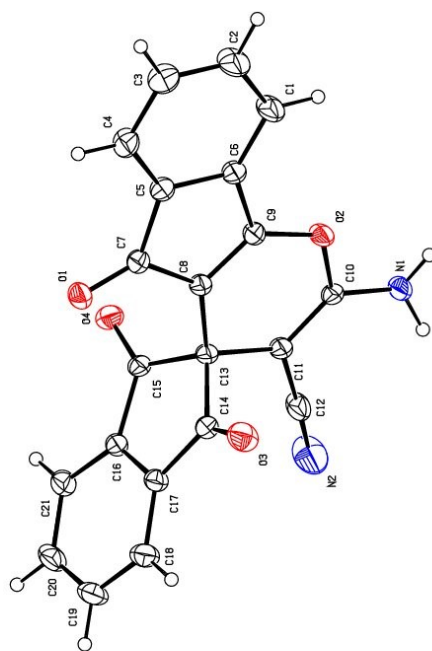

**Figure 2.** The X-ray structure of compound 12.

| Parameter                 | Value                                      |
|---------------------------|--------------------------------------------|
| 1 Data File Name          | Z.Rahimi/ 178/ fid                         |
| 2 Title                   | Z.Rahimi                                   |
| 3 Comment                 | G/ 77 HNMR                                 |
| 4 Origin                  | UXNMR, Bruker Analytische Messtechnik GmbH |
| 5 Owner                   | root                                       |
| 6 Site                    |                                            |
| 7 Spectrometer            | spect                                      |
| 8 Author                  |                                            |
| 9 Solvent                 | DMSO                                       |
| 10 Temperature            | 300.0                                      |
| 11 Pulse Sequence         | zg                                         |
| 12 Number of Scans        | 16                                         |
| 13 Receiver Gain          | 228                                        |
| 14 Relaxation Delay       | 2.0000                                     |
| 15 Pulse Width            | 9.0000                                     |
| 16 Acquisition Time       | 1.3665                                     |
| 17 Acquisition Date       | 2009-06-27T09:01:00                        |
| 18 Modification Date      | 2009-06-27T08:01:22                        |
| 19 Spectrometer Frequency | 299.87                                     |
| 20 Spectral Width         | 5995.2                                     |
| 21 Lowest Frequency       | 4.1                                        |
| 22 Nucleus                | <sup>1</sup> H                             |
| 23 Acquired Size          | 8192                                       |
| 24 Spectral Size          | 16384                                      |

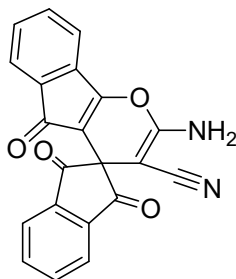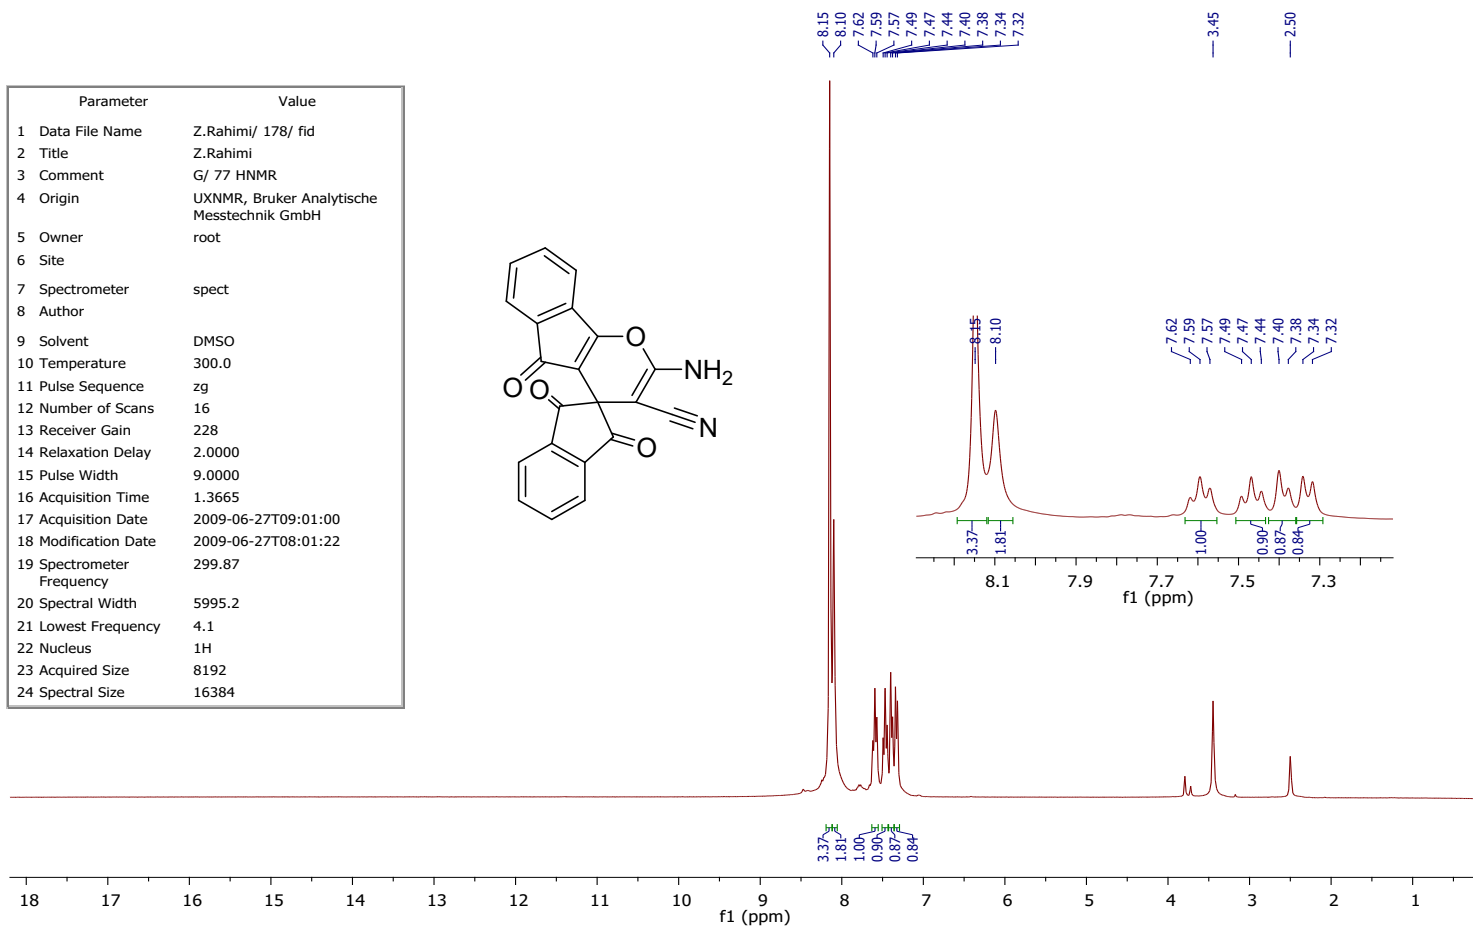

**<sup>1</sup>H NMR of 12**

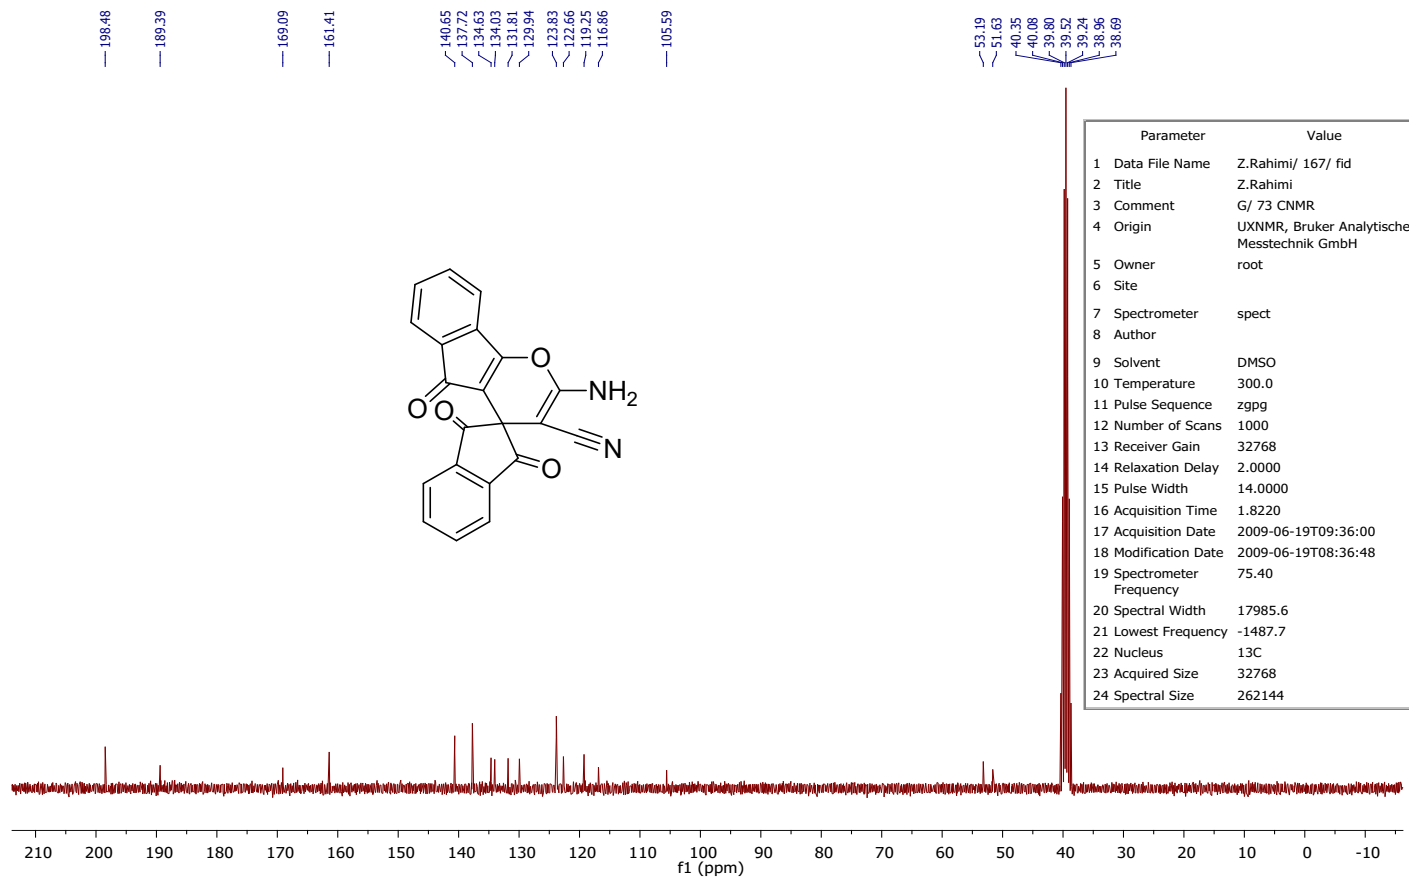**<sup>13</sup>C NMR of 12**

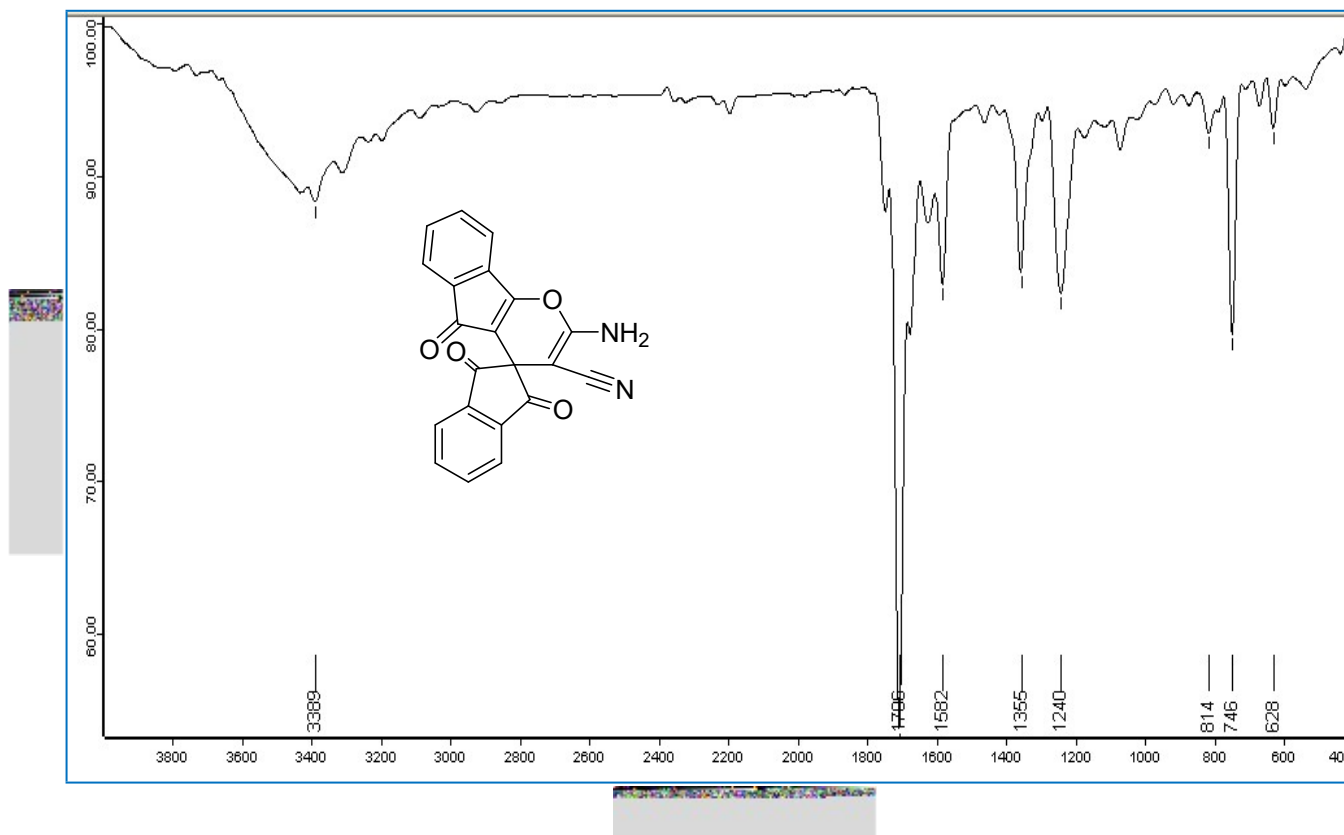

IR of 12



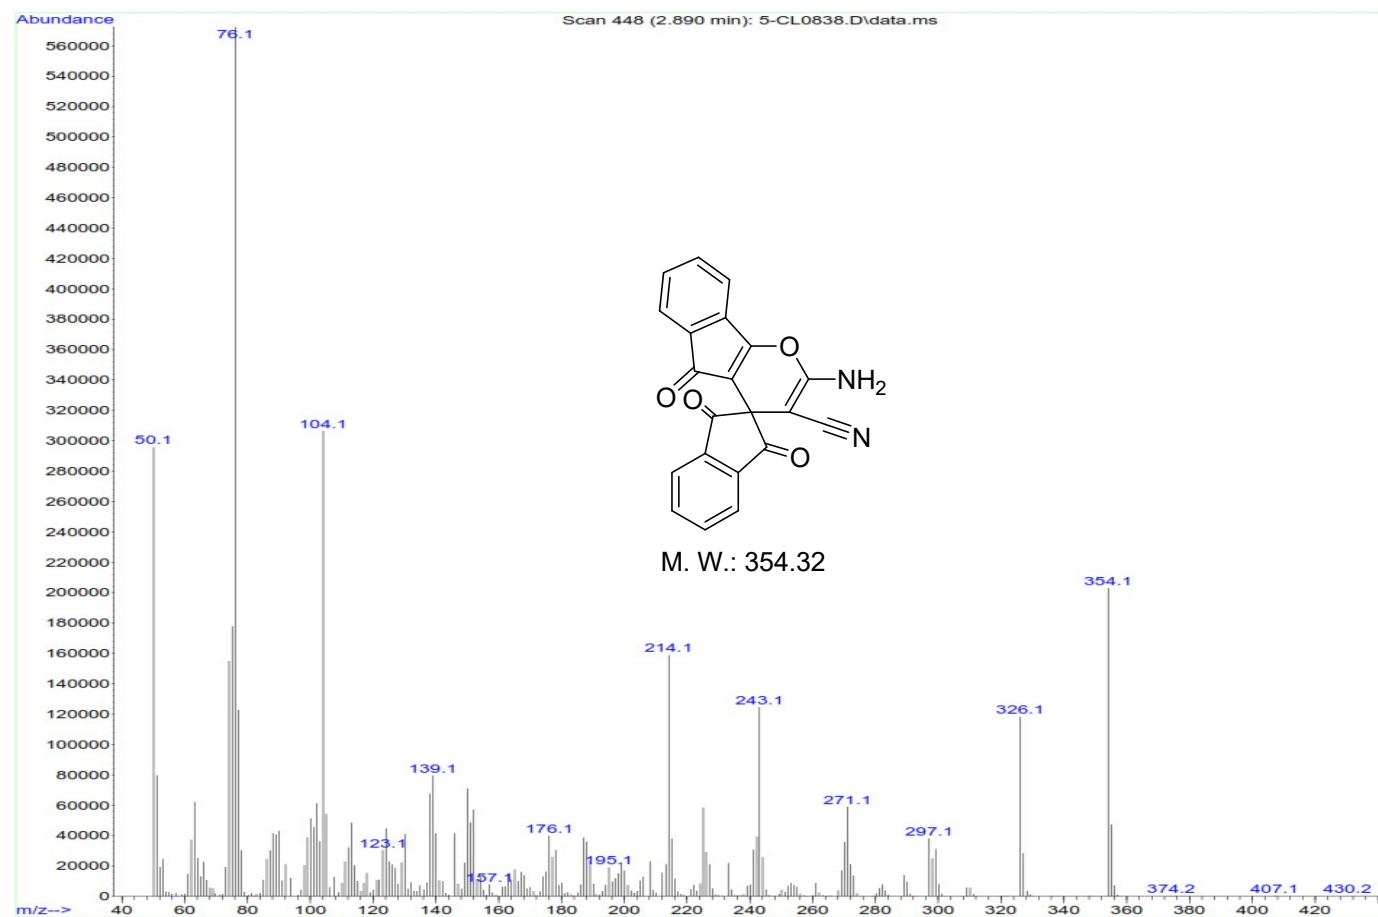**MS of 12**

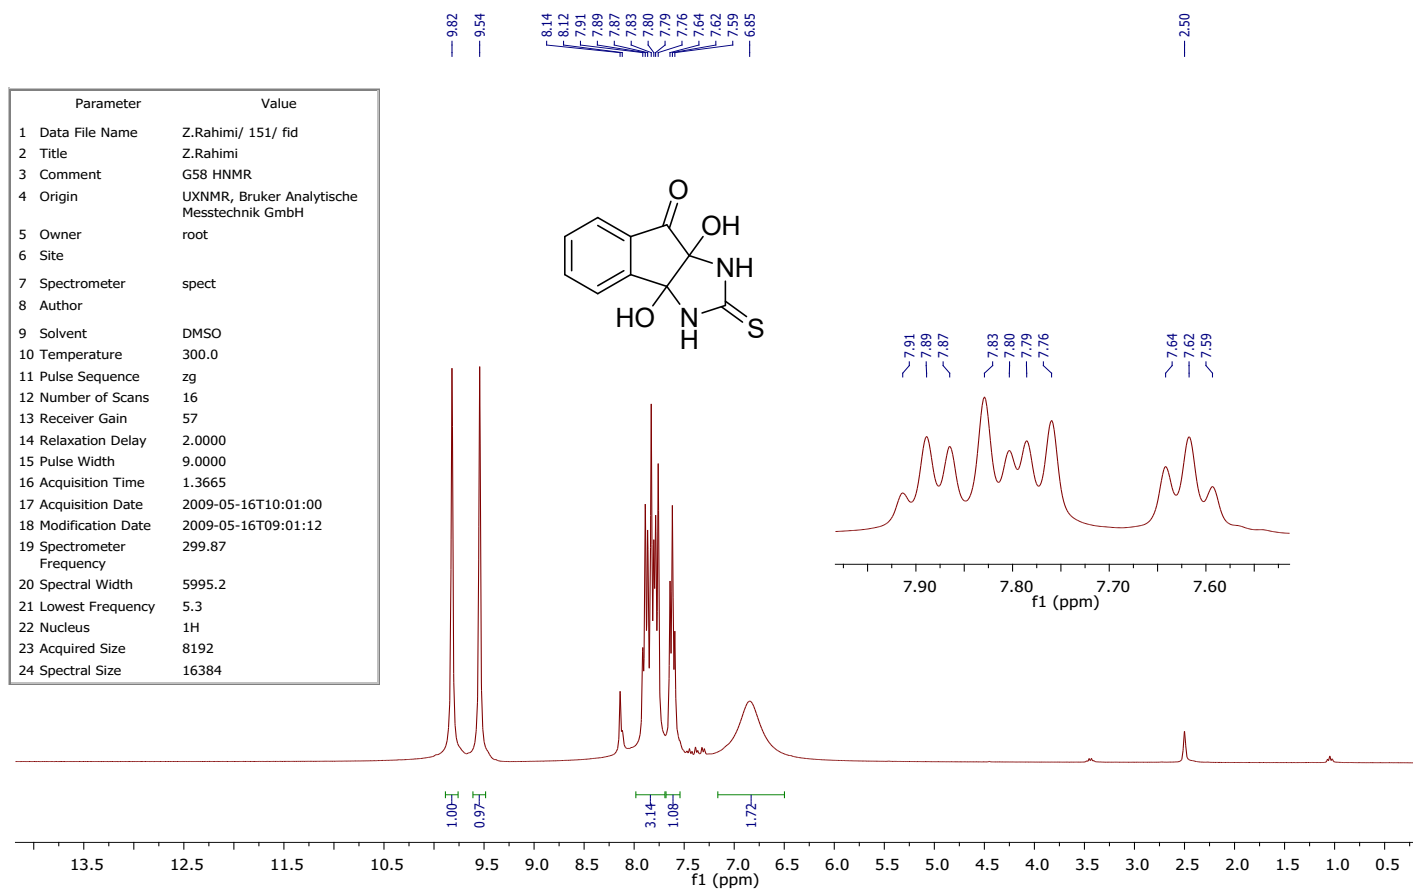 **$^1\text{H}$  NMR of 14**

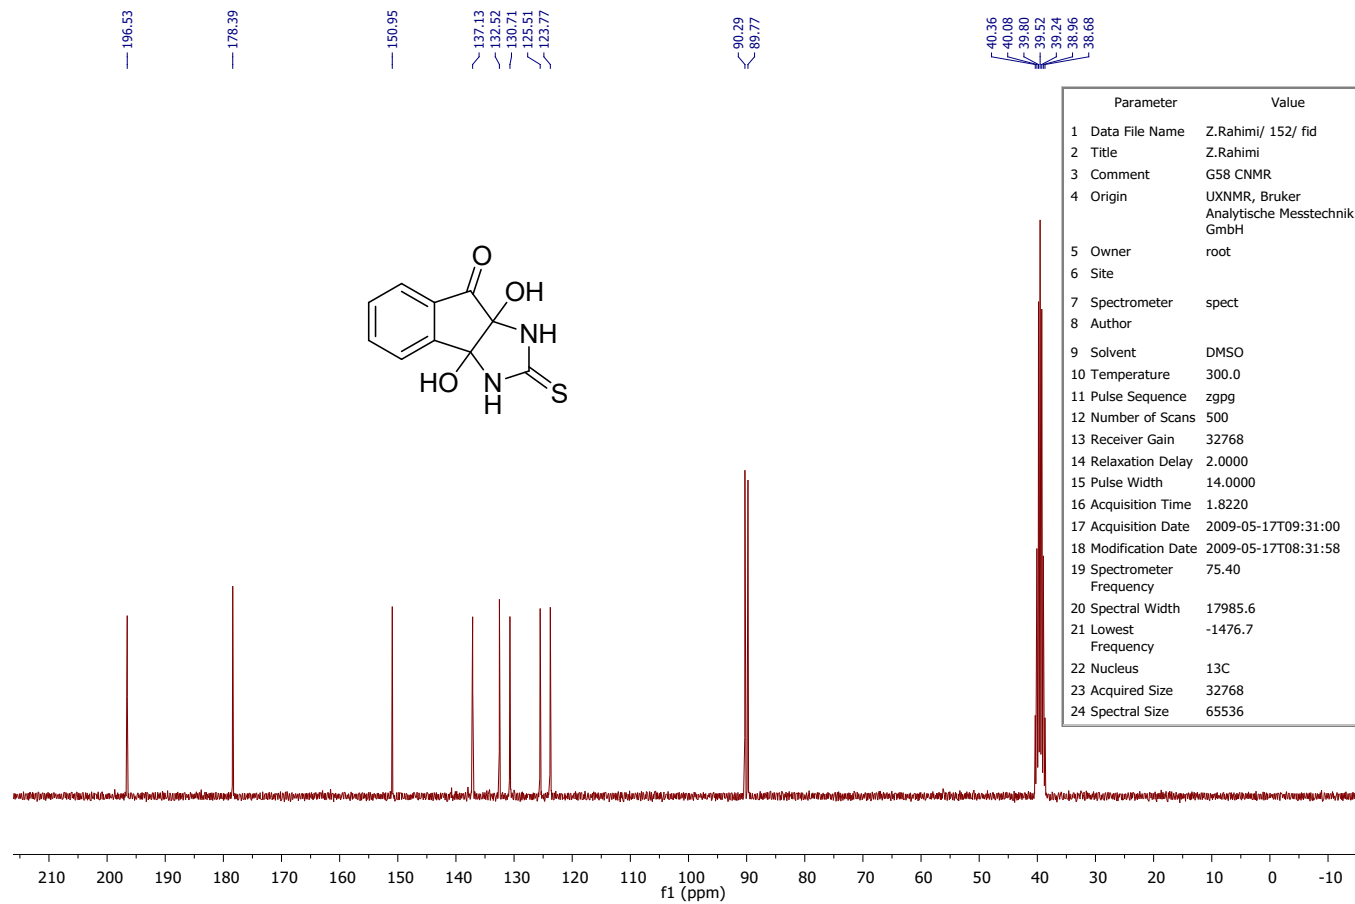**<sup>13</sup>C NMR of 14**

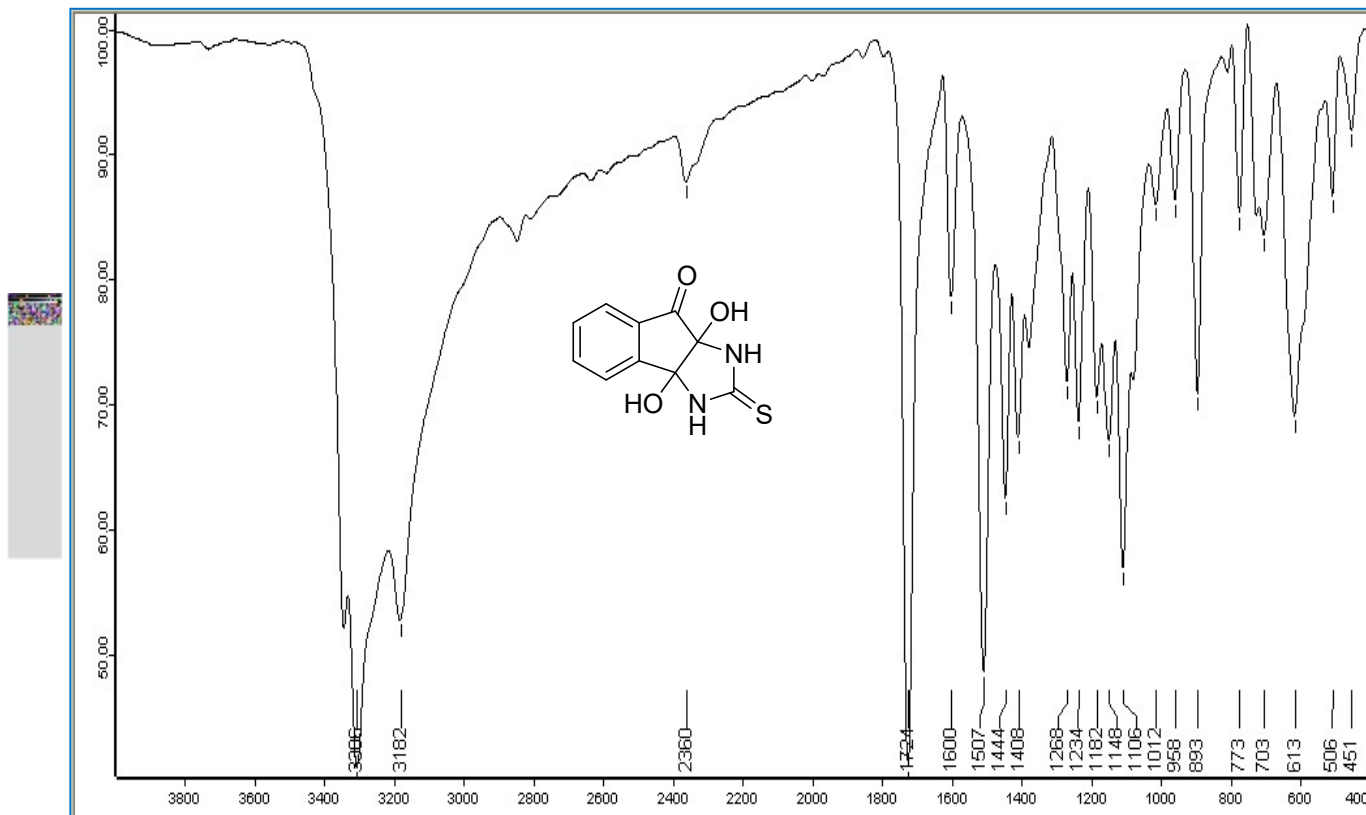

IR of 14

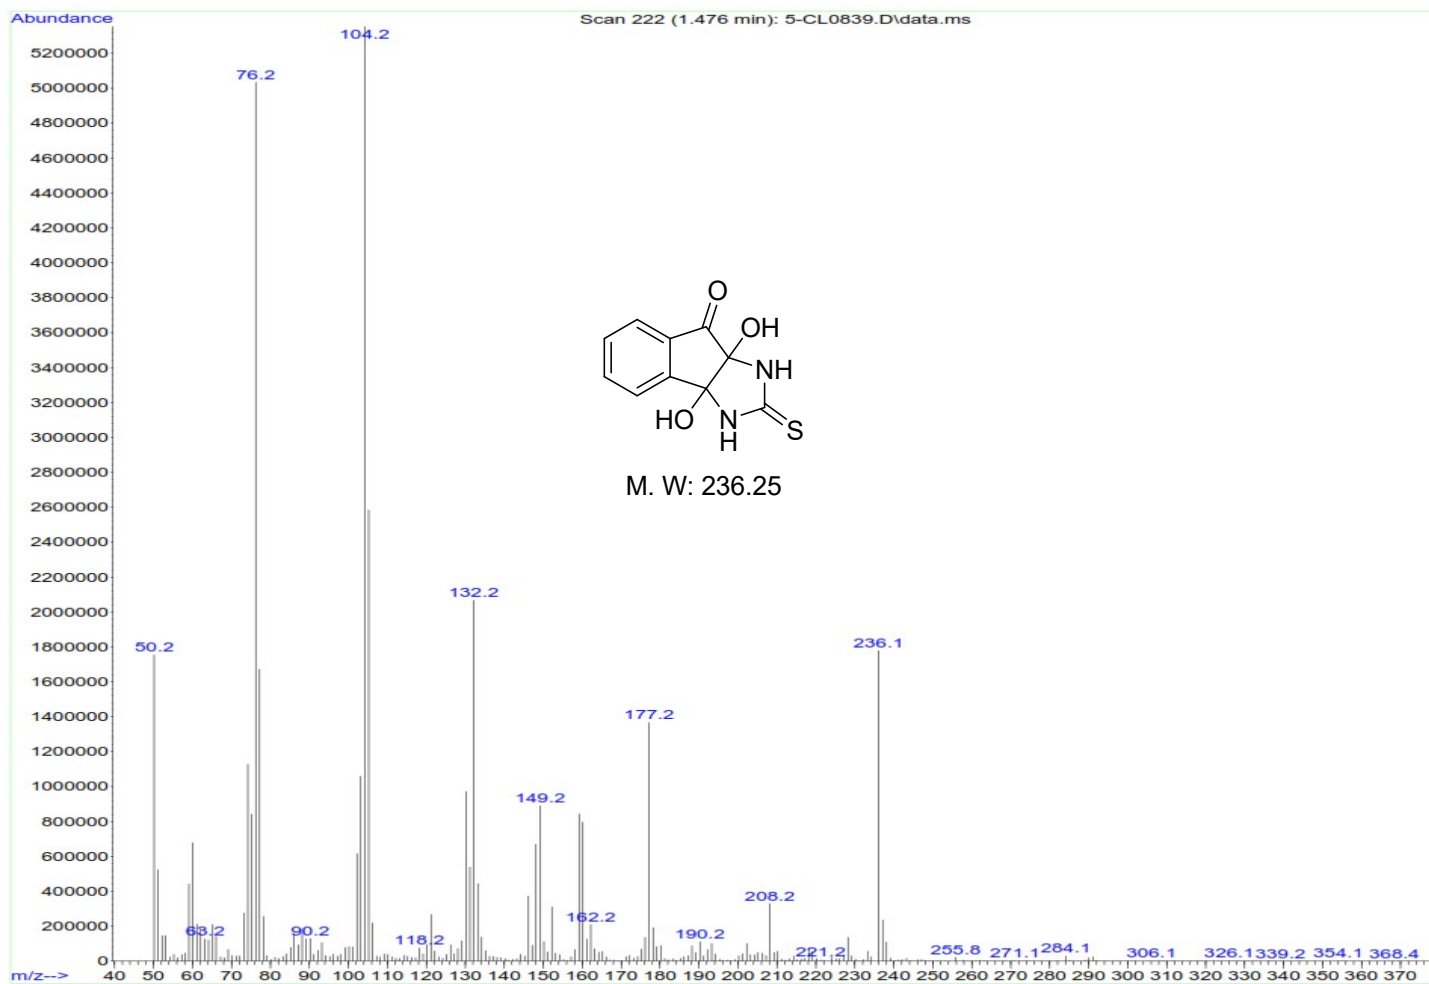

MS of 14
